# Supplementary material
Source: PubMed Central journal article supplement (PMC7958426)
Supplement: pnas.2011653118.sapp.pdf [file pnas.2011653118.sapp.pdf]

Supplementary Information for

**Mutational fitness landscapes reveal genetic and structural improvement pathways for an HIV-1 broadly neutralizing antibody**

Bharat Madan<sup>1,7</sup>, Baoshan Zhang<sup>2,7</sup>, Kai Xu<sup>2</sup>, Cara W. Chao<sup>2</sup>, Sijy O'Dell<sup>2</sup>, Jacy R. Wolfe<sup>1</sup>, Gwo-Yu Chuang<sup>2</sup>, Ahmed S. Fahad<sup>1</sup>, Hui Geng<sup>2</sup>, Rui Kong<sup>2</sup>, Mark K. Louder<sup>2</sup>, Thuy Duong Nguyen<sup>1</sup>, Reda Rawi<sup>2</sup>, Arne Schön<sup>3</sup>, Zizhang Sheng<sup>4</sup>, Rajani Nimrania<sup>1</sup>, Yiran Wang<sup>2</sup>, Tongqing Zhou<sup>2</sup>, Bob C. Lin<sup>2</sup>, Nicole A. Doria-Rose<sup>2</sup>, Lawrence Shapiro<sup>2,4,5</sup>, Peter D. Kwong<sup>2,4</sup> and Brandon J. DeKosky<sup>1,6\*</sup>

<sup>1</sup>Department of Pharmaceutical Chemistry, The University of Kansas, Lawrence, KS, 66045, USA

<sup>2</sup>Vaccine Research Center, National Institute of Allergy and Infectious Diseases, Bethesda, MD, 20814, USA

<sup>3</sup>Department of Biology, John Hopkins University, Baltimore, MD, 21218, USA

<sup>4</sup>Department of Biochemistry and Molecular Biophysics, Columbia University, New York, NY, 10027, USA

<sup>5</sup>Aaron Diamond AIDS Research Center, Columbia University Irving Medical Center, New York, NY, 10032, USA

<sup>6</sup>Department of Chemical Engineering, The University of Kansas, Lawrence, KS, 66045, USA

<sup>7</sup>These authors contributed equally.

\*Corresponding author. Email: [dekosky@ku.edu](mailto:dekosky@ku.edu)

**This PDF file includes:**

SI Methods  
Figures S1 to S14  
Tables S1 to S9

**Other supplementary materials for this manuscript include the following:**

Dataset\_S01 (208 virus panel neutralization data)  
Dataset\_S02 (read counts for vFP16.02 sort data)

## SI Methods

### Site Saturation Mutagenesis Library Construction for vFP16.02

The VH and VL genes in the pCT\_VHVL-Kappa1 (1) vector are transcribed from “+” and “-” strands, respectively via a galactose inducible bidirectional promoter Gal1/Gal10 along with CH1 (human IgG1 isotype) and CK (human Kappa) constant regions at the C-terminus of VH and VL, respectively. The C-terminus of VL also has an expression tag FLAG-tag. vFP16.02 VH and VL genes were cloned into the yeast display vector pCT\_VHVL-Kappa1 using multi-fragment infusion (Takara Bio USA, Inc.; Mountain View, CA).

The cloned plasmid was used as the template for generating VH and VL site saturation mutagenesis libraries where each codon in the sequence is replaced with an NNK (N=A/T/G/C and K=G/T) or MNN (M=C/A and N=A/T/G/C) codon for heavy and light SSM libraries, respectively, that encode for all amino acids. The degenerate oligos for the mutagenesis were synthesized in a 96-well plate format (Integrated DNA Technologies, Coralville, IA). The pCT\_vFP16.02 plasmid was digested with *AscI* and *NotI* and fragment containing heavy chain variable/bi-promoter/light chain variable regions were ligated into the pET\_conNK plasmid (kind gift of Timothy Whitehead, University of Colorado (2)), as a starting source for generating SSM libraries.

Briefly, the wild-type backbone of template plasmid was nicked and degraded with restriction enzymes. The mutant strand was synthesized with a mixture of degenerate primers to introduce point mutations into the newly synthesized DNA strand. The opposite wild-type template strand was nicked and degraded with restriction enzymes and the second mutant strand was synthesized using a universal primer via another round of PCR amplification. The PCR product was digested with *DpnI* to remove any residual wild-type template and was used to transform MegaX DH10B T1<sup>R</sup> electrocompetent cells (ThermoFisher Scientific). Following transformation the cells were plated on a 255x255 mm 2xYT (Yeast Extract Tryptone Medium) (Fisher Scientific) agar plates. After overnight incubation of the electroporation plates at 37°C the plates were scraped off to

collect in bacterial colonies in Terrific Broth (ThermoFisher Scientific). 1 mL of this mixture was maxiprepmed (2) and resulting DNA libraries were used to amplify the insert for yeast transformation described below.

### **Transformation of SSM Libraries into Yeast**

The AWY101 yeast strain was used for yeast library construction and screening (1, 3). Untransformed yeast cells were maintained in YPD medium (20 g/l dextrose, 20 g/l peptone, and 10 g/l yeast extract). VH and VL libraries were PCR amplified using the following conditions: 95°C for 2 min; 15 cycles of 98°C for 20 sec, 55°C for 15 sec, 72°C for 15 sec and final extension at 72°C for 2 min (1). PCR reactions for each library were cleaned using a PCR cleanup kit and linear DNAs were used to transform yeast in combination with linear pCT\_VHVL-Kappa1 plasmid pre-digested with *Ascl* and *NotI* restriction enzymes to generate the complete plasmid containing the entire Fab expression cassette in the AW101 yeast strain using the LiAC/DTT transformation method (4). Yeast cells were grown in 250 mL of SDCAA medium after library transformation for 16-20 hrs (TEKnova, Hollister, CA; 20 g/l dextrose, 6.7 g/l yeast nitrogen base, 5 g/l casamino acids, 8.56 g/l NaH<sub>2</sub>PO<sub>4</sub>·H<sub>2</sub>O, and 10.2 g/l Na<sub>2</sub>HPO<sub>4</sub>·7H<sub>2</sub>O) and passaged twice in SDCAA to maintain a single copy of the plasmid per yeast cell. We referred to these transformed libraries after two passages in yeast as pre-sort or input libraries.

### **Bioinformatic Analysis**

ERs for all single variants of the VH and VL SSM libraries in three affinity groups (*i.e.*, low, med, and high) were calculated using Eq. 1. Single variants were selected for experimental validation based on ER in high affinity groups in Round 2 and Round 3. We rejected any sequences in any library across all rounds of sorting that have read count <2 for ER based selection of clones with low, med and high affinity.

While selecting for high affinity variants, we verified that a particular variant did not enrich in low or medium affinity groups. Binning of mutations as low, med or high was performed based on prevalence of a mutation in each of the three affinity groups. Each mutation was assigned to an affinity group with the highest observed prevalence. i.e., the  $ER_{max}$  of each clone across high vs. medium vs. low affinity sorted populations.

Heat maps were generated using the `imshow()` (5) function of the `matplotlib` plotting library in Python (v3.6). Scatter plots were generated using the `ggscatter()` function of the `ggpubr` library in R (v3.6.2) (6). Pearson correlations for the scatter plots were calculated using `stat_cor` function of the `ggpubr` library in R (v3.6.2). A two-tailed Student's t-test was used to determine statistical significance ( $p < 0.05$ ) for five analyses (**Figs 5B, 6D, S8, S11, S12**).

We built gene-specific substitution profiles for mouse IGHV1-15 and IGKV1-117 genes to infer mutability of individual mutations. Briefly, we simulated the somatic hypermutation process starting from the germline V-genes with mutation frequency and substitution preference at each position weighted using the S5F model (7), which predicts mutability and substitution preference of AID. For comparison to the vFP16.02 antibody, we generated sequences having identical SHM levels in both VH and VL, which are 16 and 13 nucleotide mutations respectively. Sequences with stop codons were removed and a total of 10,000 sequences were generated for each gene. We then calculated mutation frequency of each AA at each V position using our bioinformatics script (8).

## **Antibody Expression and Characterization**

VH and VL genes of vFP16.02 variants were generated by site-directed point mutation on vFP16.02 antibody genes (Gene Universal, Newark, Delaware). When used in fab production, heavy chain plasmids were constructed carrying a HRV3C cleavage site inserted in the hinge region. VH and VL plasmids (1:1 DNA ratio) were co-transfected into Expi293F cells using Turbo293 transfection reagent (Speed Biosystems, Gaithersburg, Maryland) following manufacturer's protocols. After transfection, cells were incubated in shaker incubators at 120 rpm, 37°C, 9%

CO<sub>2</sub> overnight. On the next day, one tenth culture volume of AbBooster medium (ABI scientific Inc, STERLING, Virginia) was added to each flask of transfected cells. Cell cultures were incubated at 120 rpm, 33°C, 9% CO<sub>2</sub> for an additional 5 days. Cell culture supernatant was harvested at 6 days post transfection. IgGs were purified from the supernatants using protein A chromatography. Fabs were obtained through on column HRV3C cleavage. The fabs were further purified by size exclusion chromatograph (SEC) in a Superdex 200 column (GE) with a PBS buffer (for affinity analysis) or buffer containing 5mM HEPES, pH 7.5, 150mM NaCl (for protein crystallization).

## **Affinity Assays**

### *Octet for soluble FP*

A fortéBio Octet HTX was used to measure binding of soluble FP to the vFP16.02 mouse antibody variants. Assays were performed in tilted black 384-well plates (Geiger Bio-One) with 1x kinetic buffer (purchased from fortéBio) with agitation set to 1,000 rpm. Mouse antibody IgG at 20 µg/mL were immobilized using Anti-Mouse IgG Fc biosensors for 300 s. To measure binding of vFP16.02 IgG variants to soluble FP-1M6T, the immobilized IgG were dipped into solutions of FP at a two-fold serial dilution with a starting concentration of 100 nM for 60 s. Reference sensors were loaded with mouse IgG and dipped into 1x kinetic buffer. Baseline drift was corrected for through parallel subtraction of reference sensors from sample measurements and fitted globally using a 1:1 model.

### *SPR for trimer affinity*

Binding affinities and kinetics of vFP16.02 mouse antibodies to HIV-1 Env were assessed on a Biacore T200 (GE Healthcare) in HBS-EP+ buffer (10 mM HEPES, pH7.4, 3 mM EDTA, 150 nM NaCl, and 0.05% surfactant P-20) at 25° C. To prepare the chip, 2G12 IgG was immobilized onto a CM5 chip by amine coupling to 8,000-10,000 response units (RU). BG505 DS-SOSIP at 250nM was then captured to ~400 RU in the sample flow cell on the 2G12 sensor chip. To measure affinity to antibody Fabs, two-fold serial dilution of mouse vFP16.02 Fabs were

injected into the sample and reference cells for 180 s followed by 300 s of dissociation at a flow rate of 30  $\mu$ L/min. The starting concentration of the Fabs were varied between 25 nM and 5 nM depending on their affinity to the BG505 DS-SOSIP trimer. The chip surface was regenerated using 3M  $MgCl_2$  at a flow rate of 50  $\mu$ L/min for 30 s. Reference sensorgrams were obtained by flowing equal volumes of 1x HBS-EP+ buffer instead of antibody Fab solution. Sensorgrams from the concentration series were corrected to the blank reference curves and fitted globally using a 1:1 Langmuir model through the BIAevaluation software.

### **X-ray Crystallization and Structural Analysis**

Crystals of S48K Fab complexed with FP8 were obtained from 0.1 M Tris-HCl pH8.5 and 30% v/v PEG 400 and grew to dimensions of 200  $\mu$ m x 200  $\mu$ m x 100  $\mu$ m. Crystals of F60P Fab complexed with FP8v1 were obtained from 9.9% v/v Isopropanol, 0.1 M Tris-HCl pH8.5, and 9.9% v/v PEG 3350 and grew to dimensions of 200  $\mu$ m x 200  $\mu$ m x 150  $\mu$ m. Crystals were cryoprotected in 25% glycerol and flash-frozen in liquid nitrogen. Data were collected at 100 K and a wavelength of 1.00  $\text{\AA}$  at the SER-CAT beamline ID-22 (Advanced Photon Source, Argonne National Laboratory). Diffraction data were processed with HKL2000 (9). Structure solution was obtained by molecular replacement with Phaser (10) using homologous vFP16.02 Fab:FP complex structure (PDB ID: 6CDO) as search model. Model building was carried out with Coot (11), followed by refinement with Phenix (12). Structure parameter were validated by MOLPROBITY (13) during refinement. Ramachandran statistical analysis indicated that the final structures contained no more than 0.2% disallowed residues. Data collection and refinement statistics are shown in Table S9.

### **Isothermal Titration Calorimetry**

The results are expressed per mole of Fab and the stoichiometry,  $N$ , denotes the number of binding sites per mole of trimer. The heat associated with binding was obtained from the integral of the calorimetric signal after adjustment of the

heat of dilution. The enthalpy change,  $\Delta H$ , the association constant,  $K_a$  (the dissociation constant,  $K_d = 1/K_a$ ) and the stoichiometry,  $N$ , were obtained by nonlinear least square analysis of the data to a single-site binding model using Origin with a fitting function made inhouse. Gibbs energy,  $\Delta G$ , was calculated from the binding affinity using  $\Delta G = -RT \ln K_a$ , ( $R = 1.987 \text{ cal}/(\text{K} \times \text{mol})$ ) and  $T$  is the absolute temperature in kelvin). The entropy contribution to Gibbs energy,  $-T\Delta S$ , was calculated from the relation  $\Delta G = \Delta H - T\Delta S$ .

### **Molecular Dynamics Simulation**

The modeled Fab structures for VL-S48K and VL-F60P were solvated in a 15Å padding water box and neutralized by the addition of NaCl at a concentration of 150 mM. The final systems were composed of about 47000 atoms and measured 97 x 69 x 77 Å<sup>3</sup>.

The MDs were performed using NAMD2.13 engine (14), with the CHARMM36 force field(15, 16). TIP3P water parameterization was utilized to describe the water molecules(17). The periodic electrostatic interactions were computed using particle-mesh Ewald (PME) summation with a grid spacing smaller than 1 Å. Constant temperature was imposed by using Langevin dynamics with a damping coefficient of 5.0 ps. The system was first minimized by 20000 conjugate gradient steps and then equilibrated by using a linear temperature gradient, which heated up the system from 100 to 310 K in 2 ns. An additional 10 ns were done before removing all restraints. The length of all bonds involving hydrogen atoms was constrained with the RATTLE algorithm, thus allowing a time step of 2 fs. Unrestrained molecular dynamics were performed up to 500 ns.

ABangle (18) was used to characterize the VH:VL interface angle. Statistical significance was determined using Mann-Whitney U test.

## Supplementary Figures

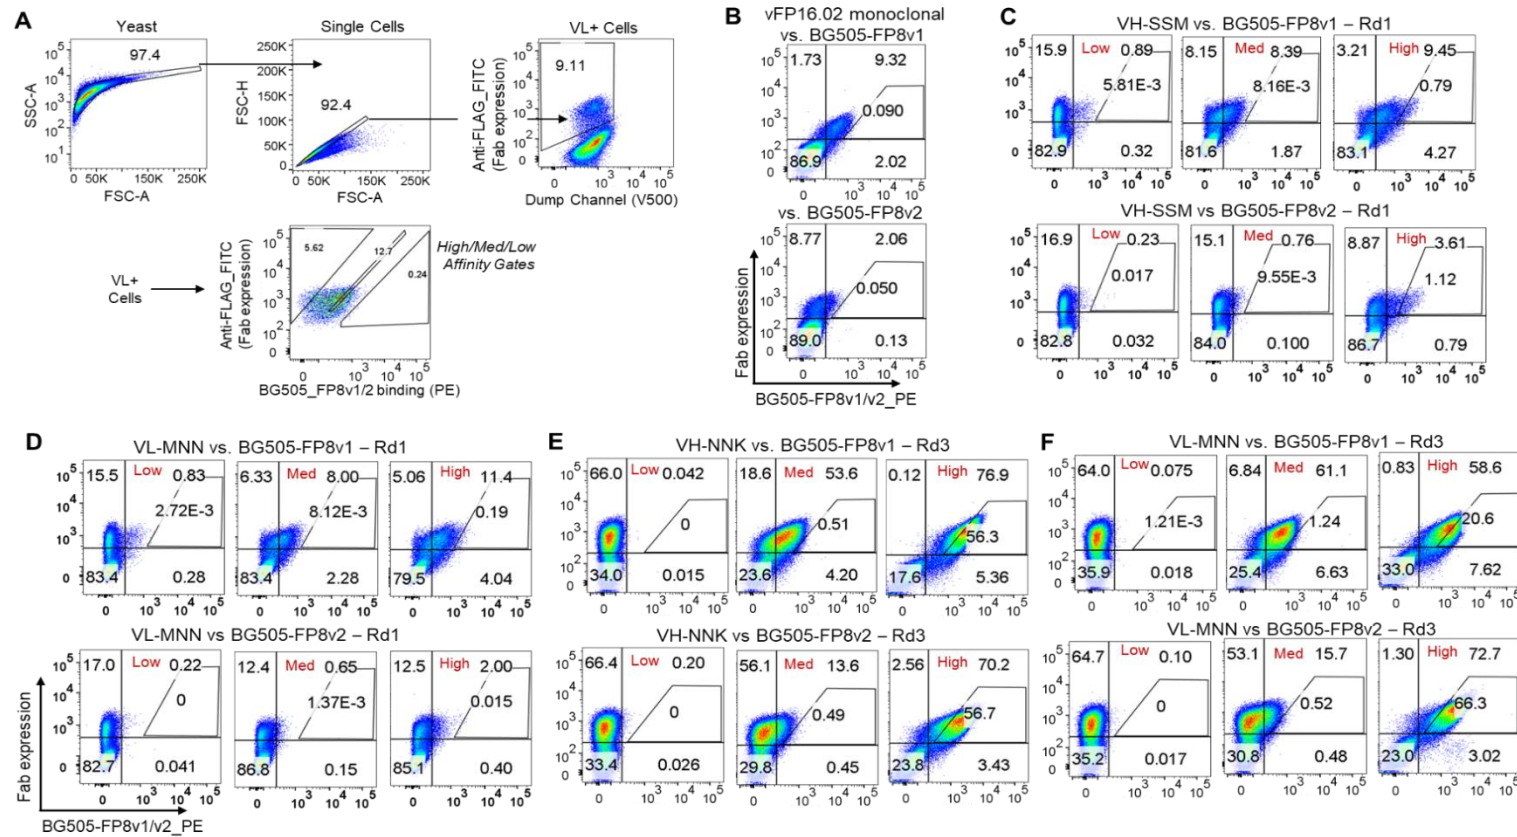

**Figure S1. Affinity based sorting of vFP16.02 heavy and light chain SSM libraries against BG505-FP8v1 and -v2. (A)** FACS gating strategy for affinity-based sorting of SSM libraries. **(B)** FACS analysis for vFP16.02 monoclonal fab stained against BG505-FP8v1 at 70 nM (top panel) and BG505-FP8v2 (100 nM). **(C)** and **(D)** FACS analysis of Round 1 sorted Low/Med/High populations showing phenotypic shifts when comparing between the Low, Med, and High gated populations. **(E)** and **(F)** FACS analysis of Round 3 sorted and enriched populations showing a higher degree of phenotypic population shifts as compared to Round 1. Upper panels in **(B)** to **(F)** show FACS plots for libraries stained against BG505-FP8v1 (70 nM), and bottom panels show libraries stained against BG505-FP8v2 (100 nM).



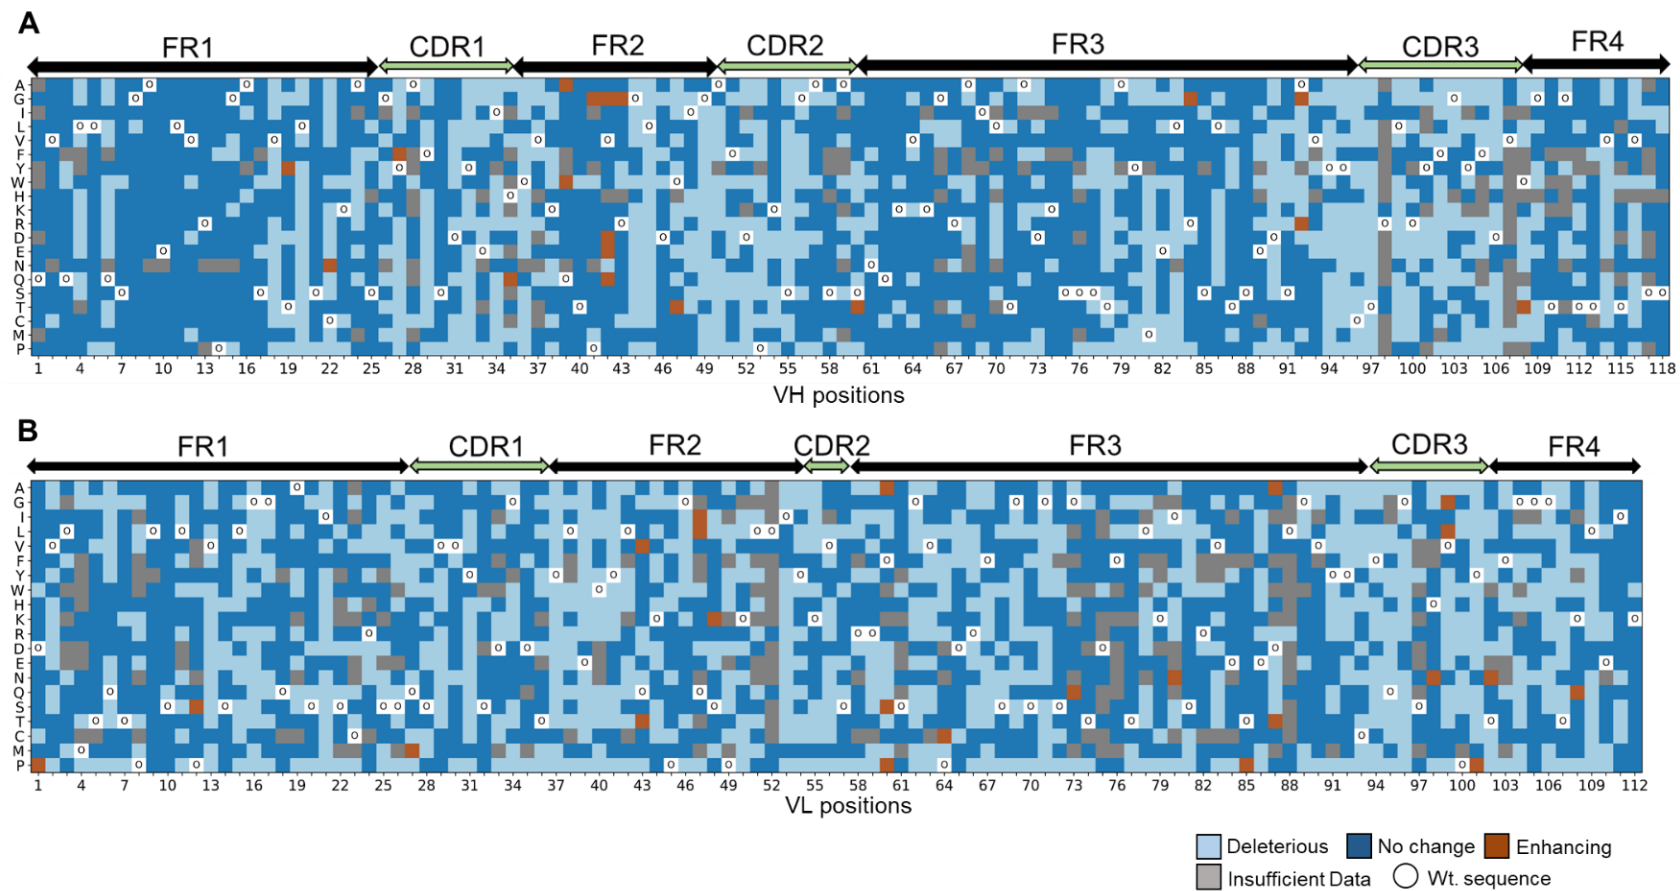

**Figure S2. Heat maps showing the functional impact of single mutations in the vFP16.02 variable regions. (A) Heavy chain and (B) Light chain variable regions sorted against BG505-FP8v2.**

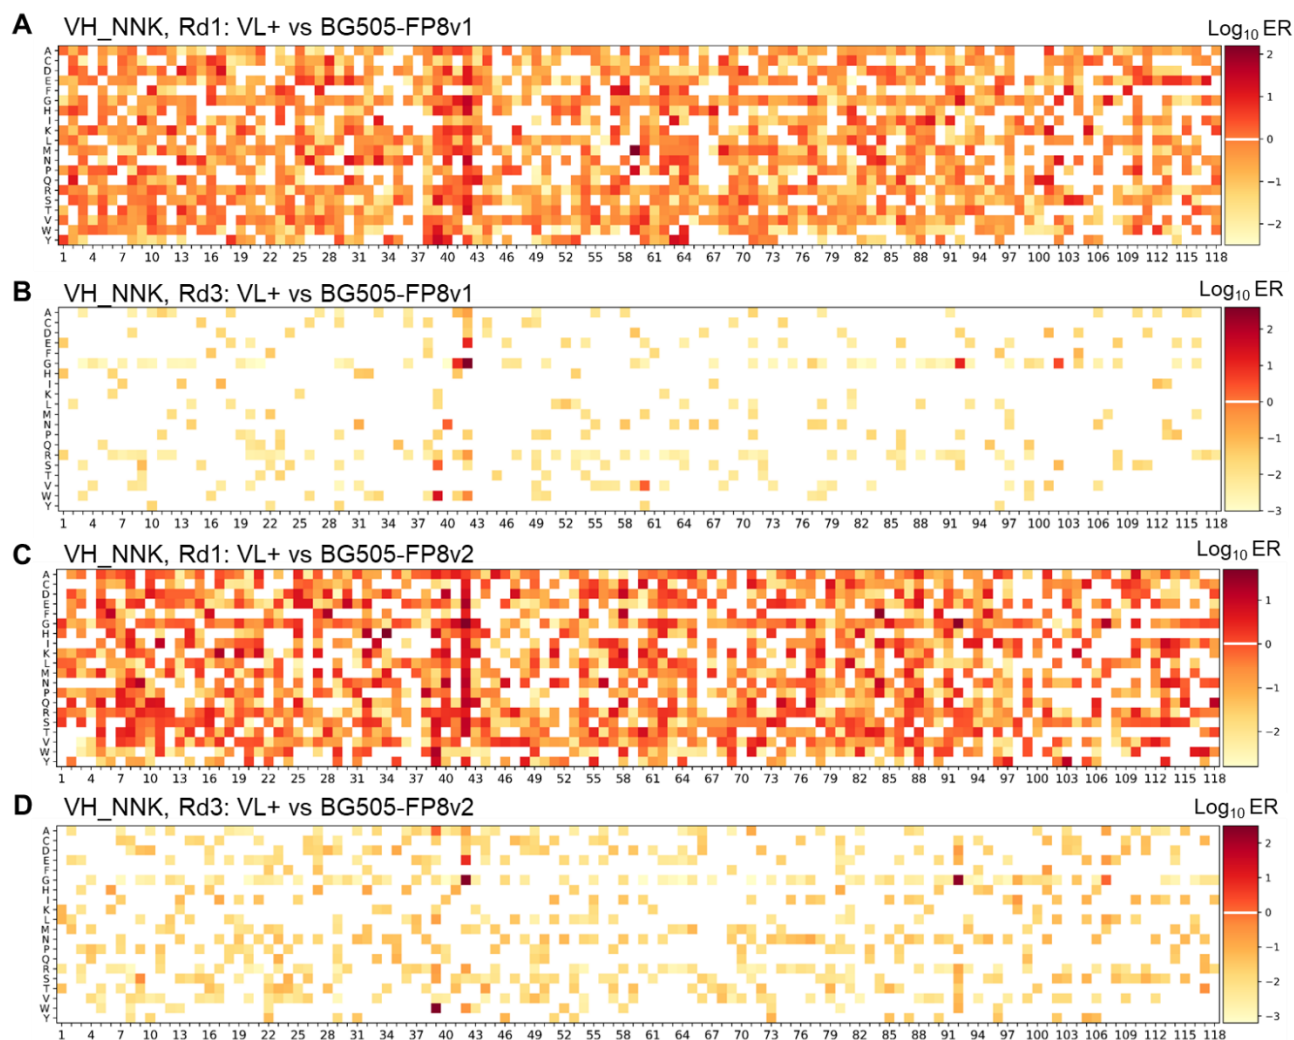

**Figure S3. Mutational landscape of high affinity gate population of VH\_NNK libraries against BG505-FP8v1 and v2, shown as ER heat maps. (A) VH\_NNK library against BG505-FP8v1 after the first round of enrichment, and (B) after the third round of enrichment. (C) VH\_NNK library against BG505-FP8v2 after the first round of enrichment, and (D) after the third round of enrichment.**

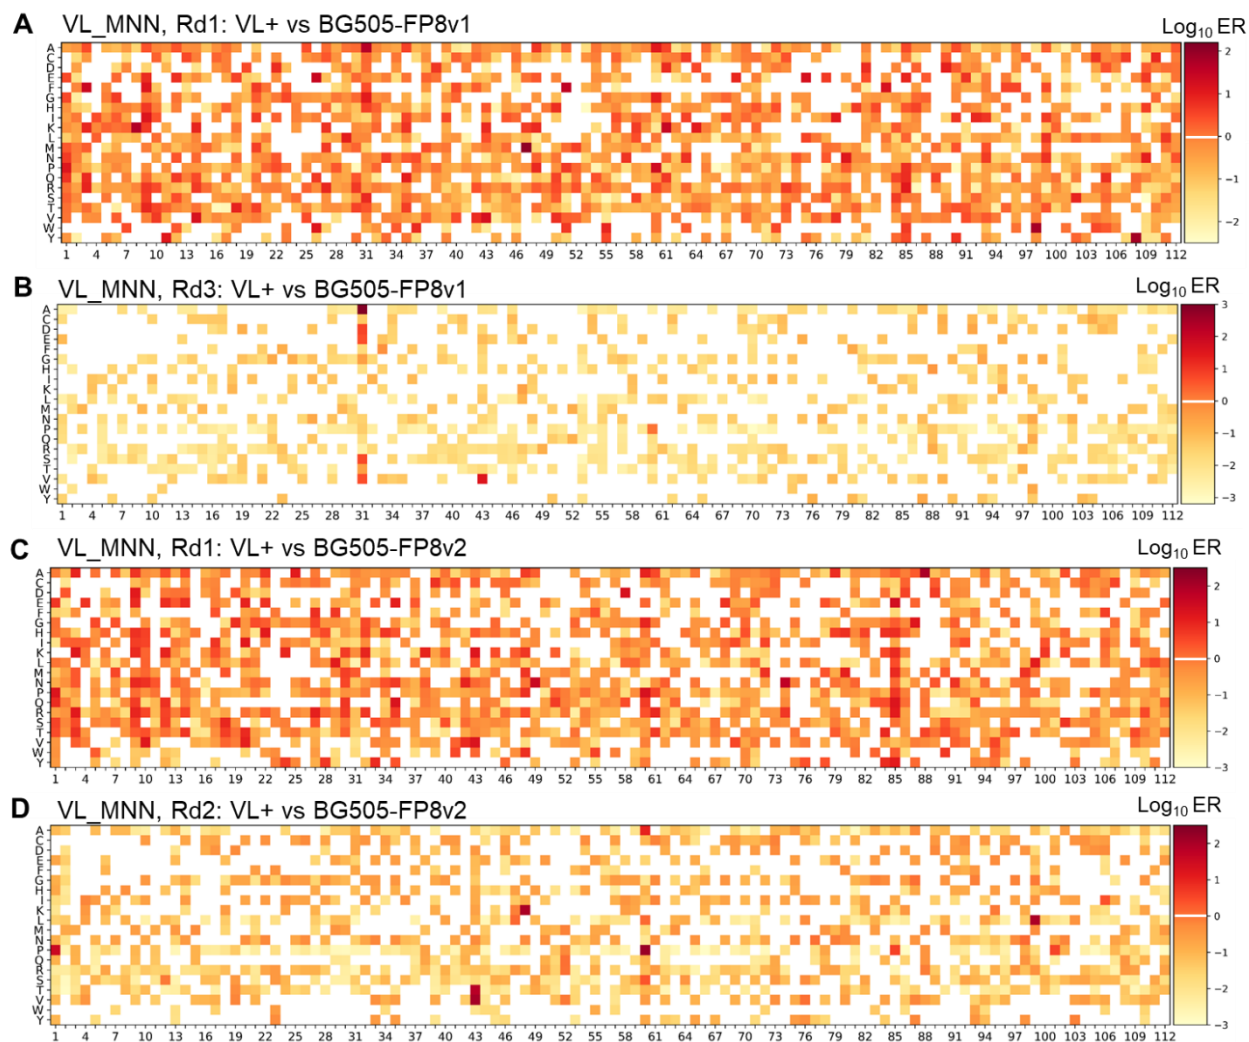

**Figure S4. Mutational landscape of high affinity gate population of VL-MNN libraries against BG505-FP8v1 and v2 shown as ER heat maps. (A)** VL-MNN library against BG505-FP8v1 after the first round of enrichment, and **(B)** after the third round of enrichment. **(C)** VL-MNN library against BG505-FP8v2 after the first round of enrichment, and **(D)** after the third round of enrichment.

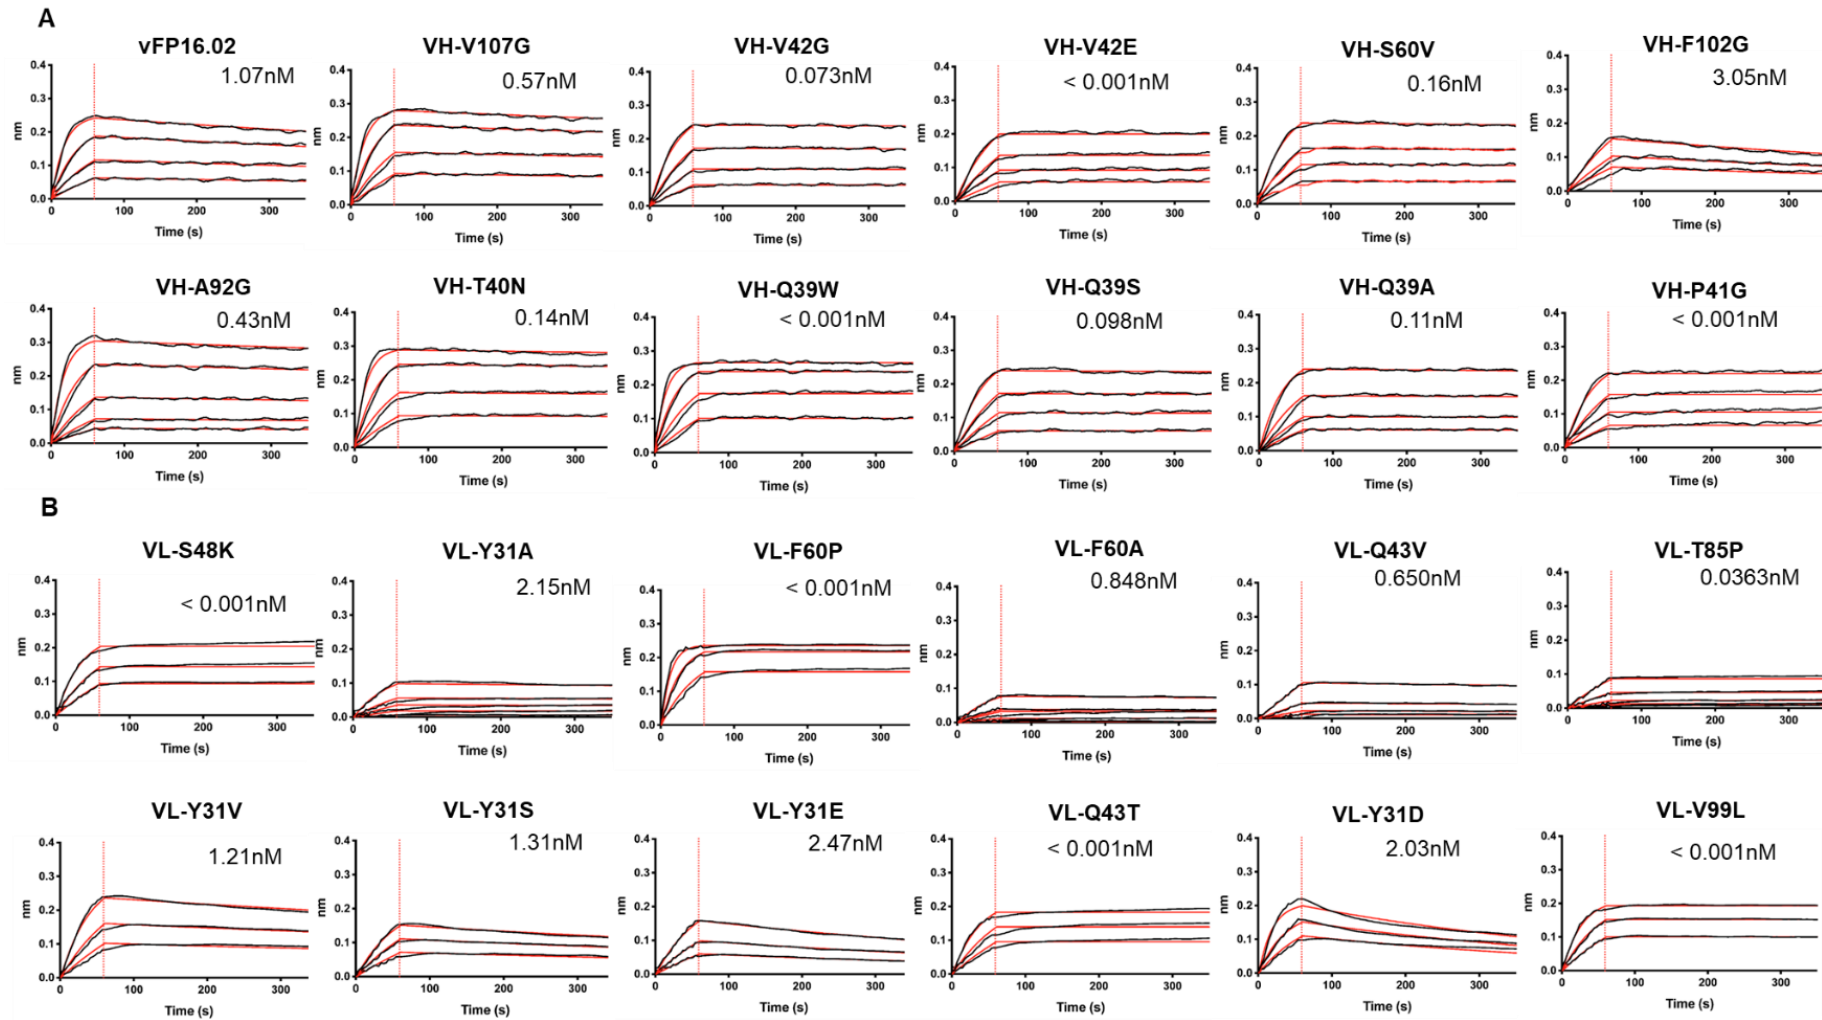

**Figure S5. Bio-layer interferometry response curves for vFP16.02 single mutational variants against fusion peptide. (A) Heavy chain mutation variants, and (B) light chain mutation variants.**

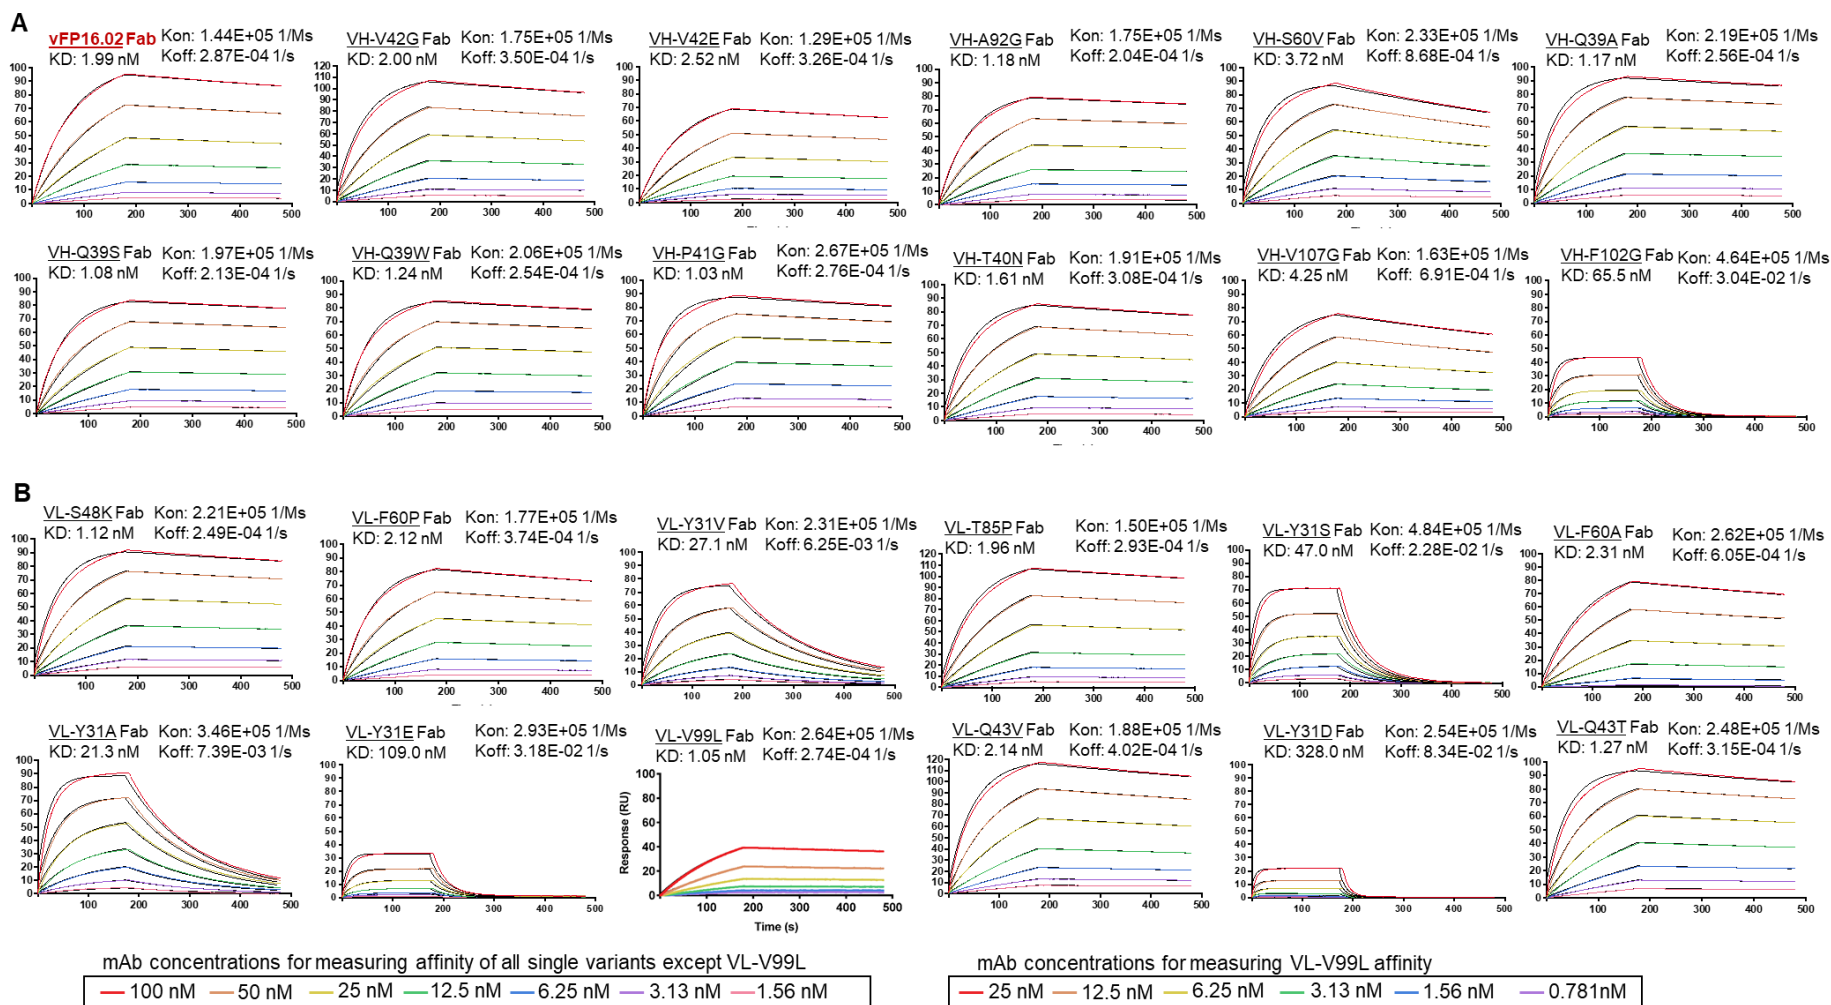

**Figure S6. Surface plasmon resonance response curves for vFP16.02 single mutational variants against the BG505-FP8v1 DS.SOSIP HIV-1 Env trimer. (A) Heavy chain mutation variants, and (B) light chain mutation variants.**

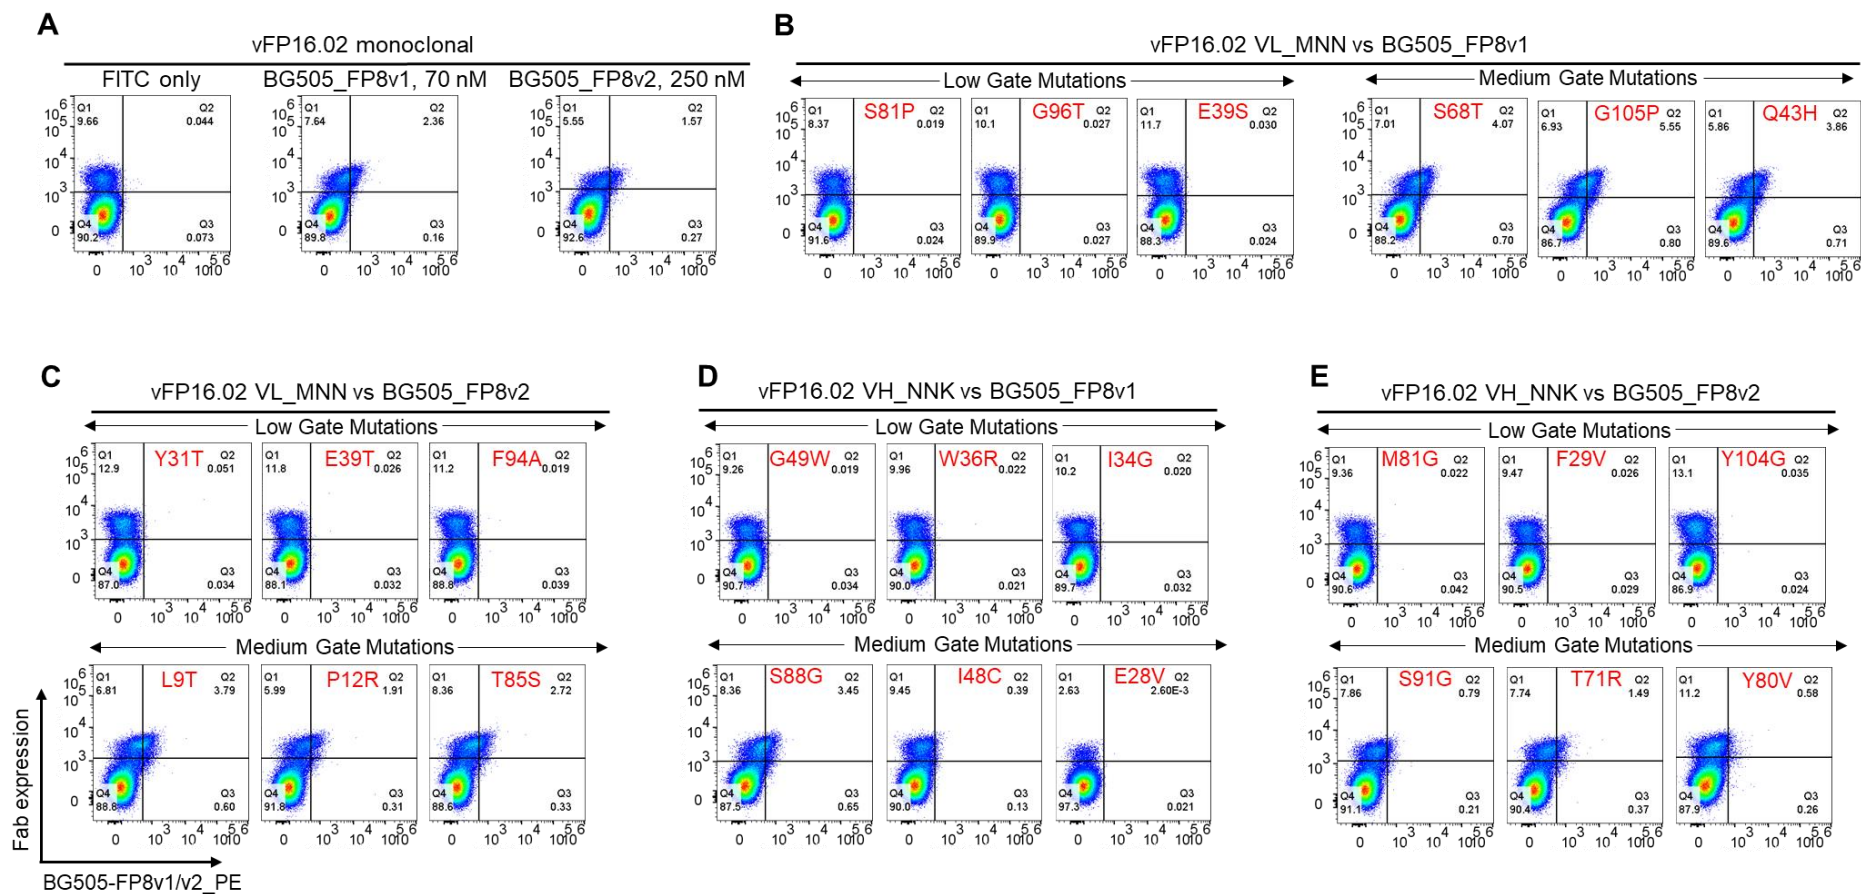

**Figure S7. Evaluation of single variants enriched in low and medium gates for binding to BG505\_FP8v1 and BG505\_FP8v2.** (A) FACS analyses of vFP16.02 monoclonal Fab stained against BG505\_FP8v1 (70 nM) and BG505\_FP8v2 (250 nM). Single variants enriched in the low and medium affinity sorts were selected from the VL\_MNN library sorted against (B) BG505\_FP8v1 and (C) BG505\_FP8v2. Single variants enriched in the low- and medium-affinity sorts were selected from the VH\_NNK library sorted against (D) BG505\_FP8v1 and (E) BG505\_FP8v2.

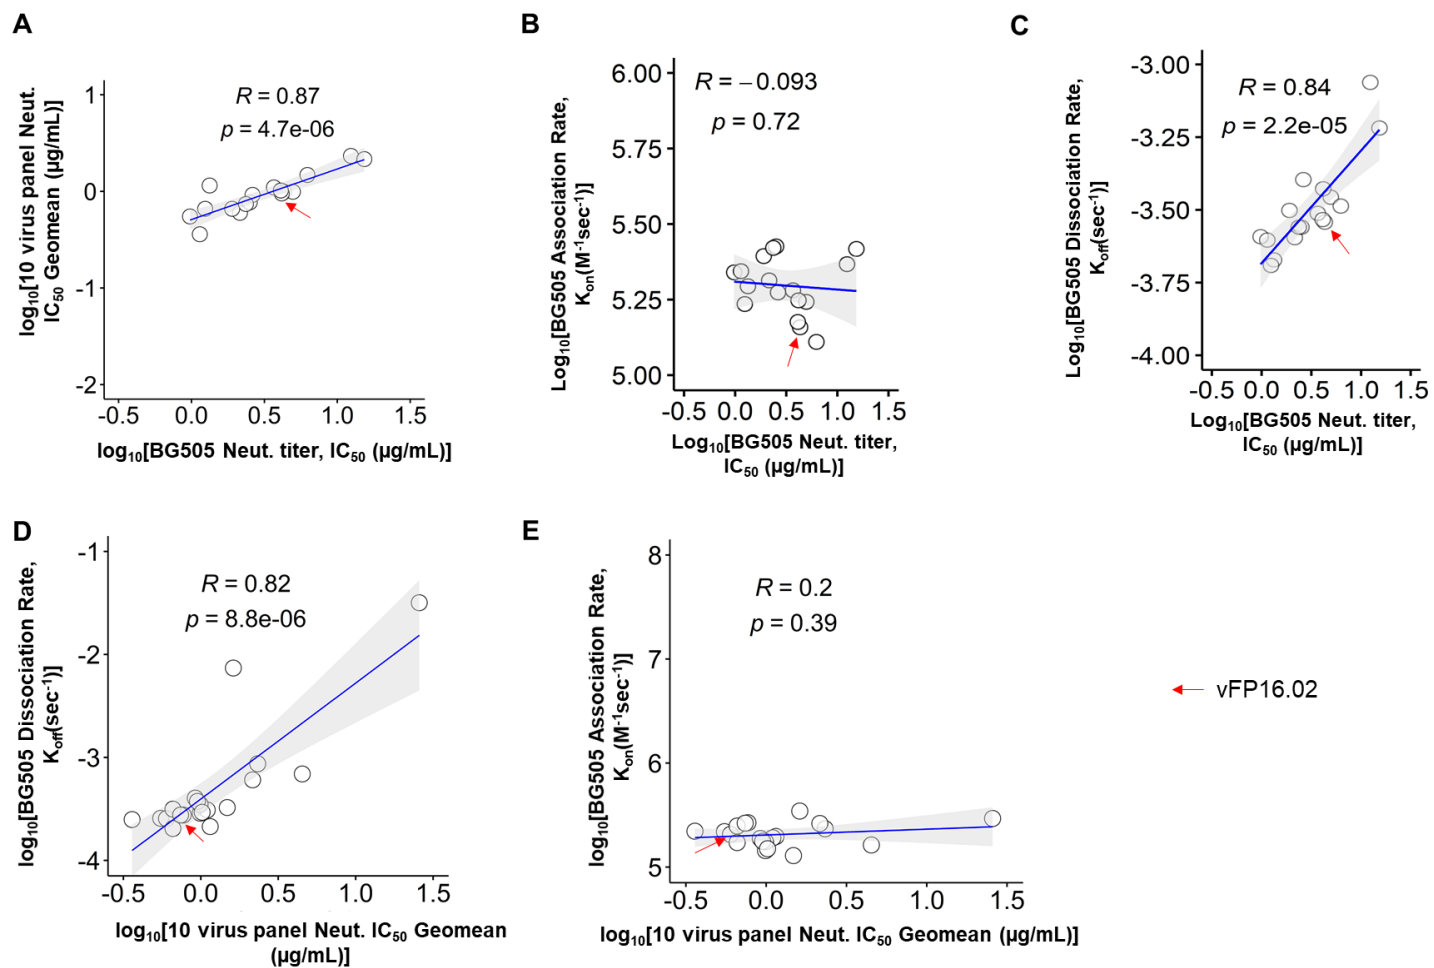

**Figure S8. Correlations between biochemical parameters of vFP16.02 single variants.** Correlations were plotted for variants when assessed neutralization potencies at a maximum IC<sub>50</sub> level of 50 μg/mL. Shaded areas indicate 95% confidence limits.

**vFP16.02 VL-F60P**

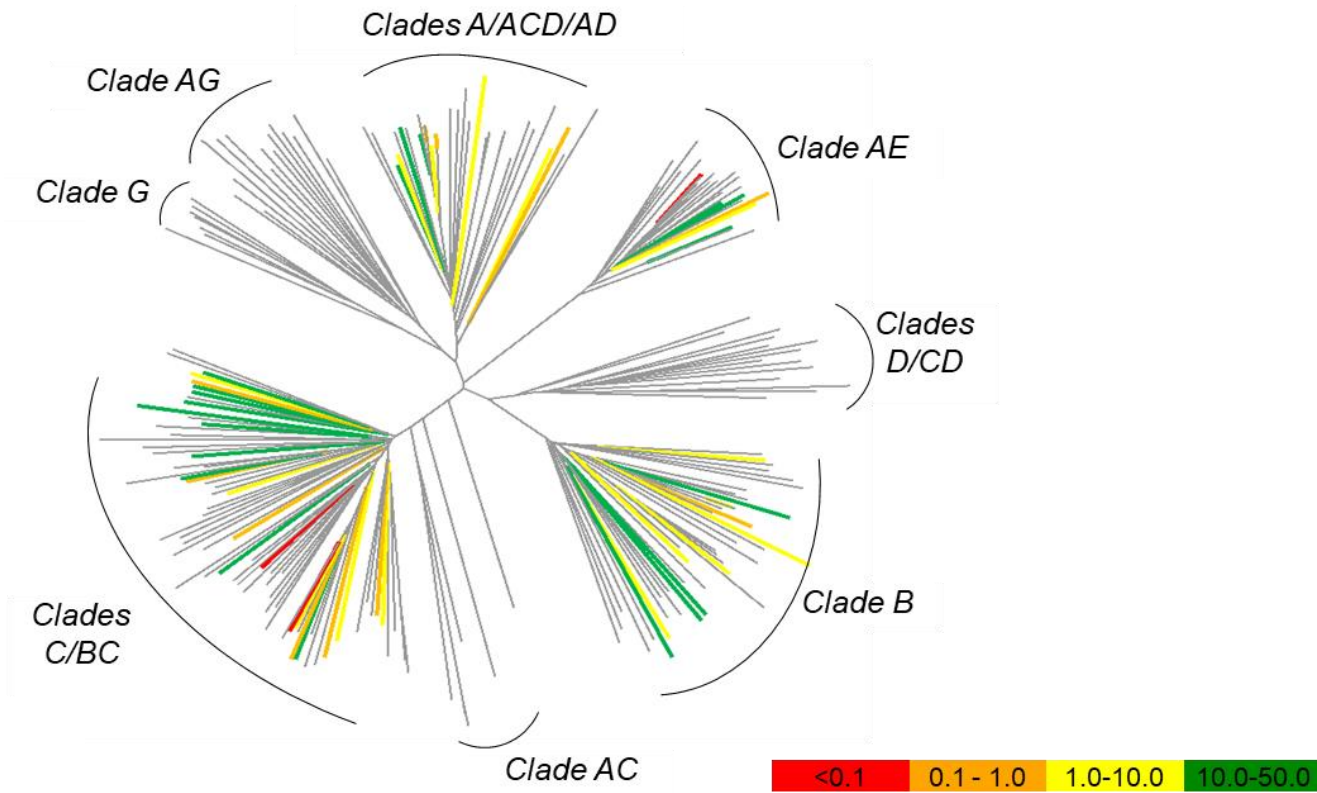

**Figure S9. Neutralization dendrograms for vFP16.02 VL-F60P tested on 208-isolate panel. Also, see neutralization dendrogram for vFP16.02 in Fig. 3 in (19).**



### A Heavy Chain Variants

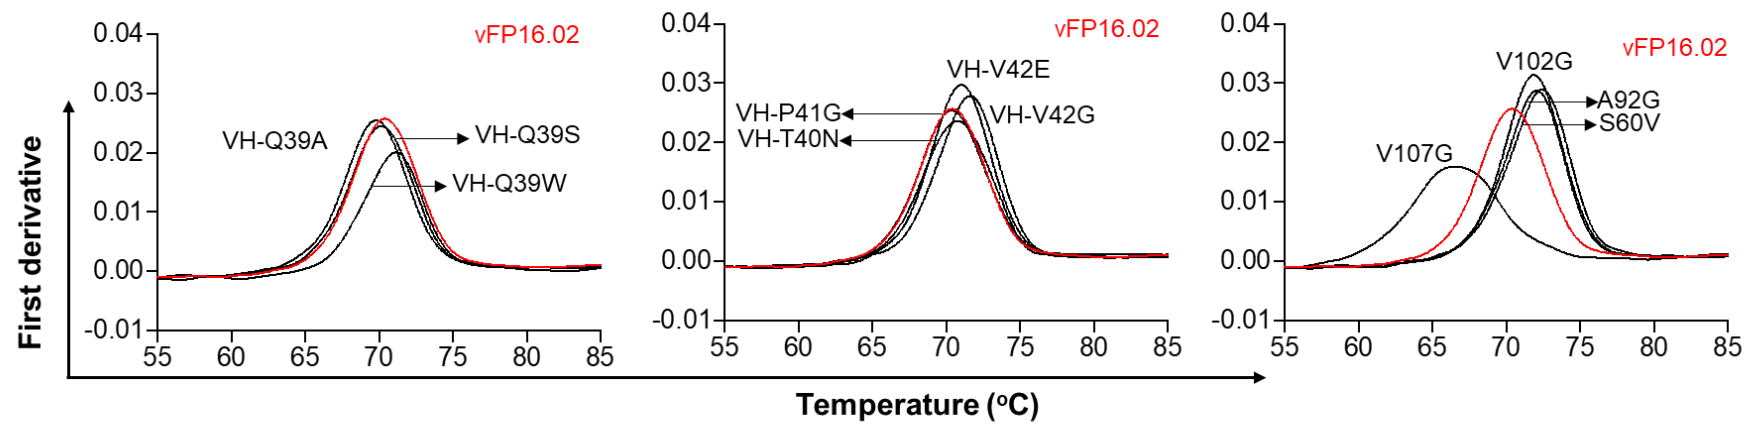

### B Light Chain Variants

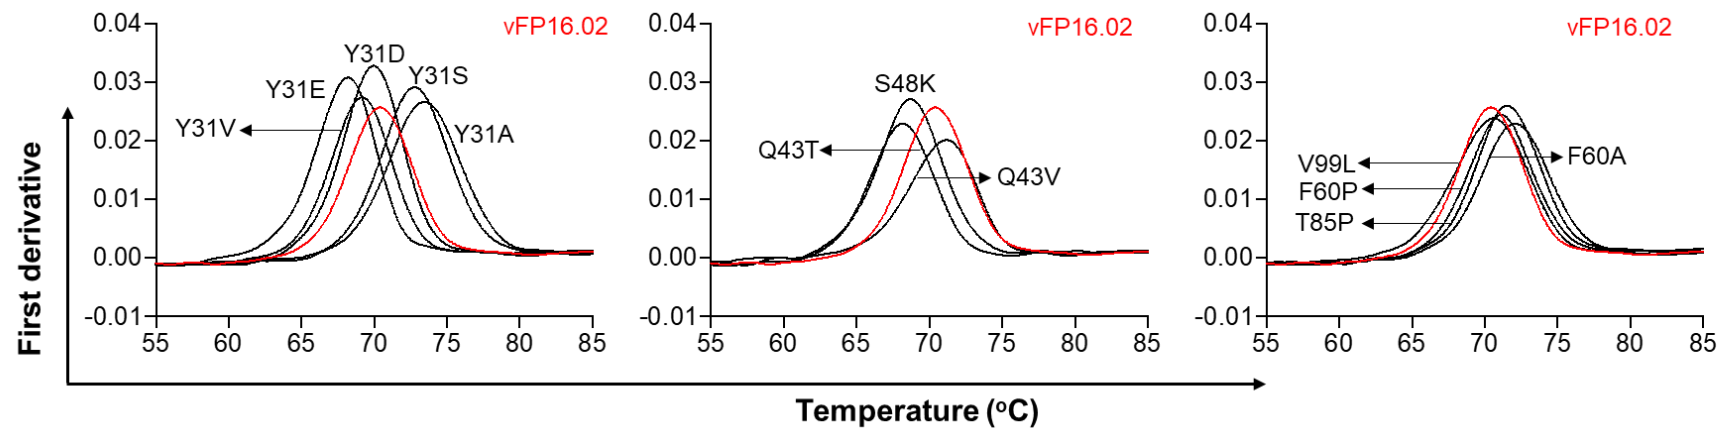

**Figure S10. Effect of single vFP16.02 mutations on protein melting curves.** nanoDSF measurement of  $T_m$  values of vFP16.02 variants were grouped by the locations of mutations in (A) heavy chains, and (B) light chains. vFP16.02 is shown in red, other curves are indicated by their point mutations and placed according to  $T_m$  values.

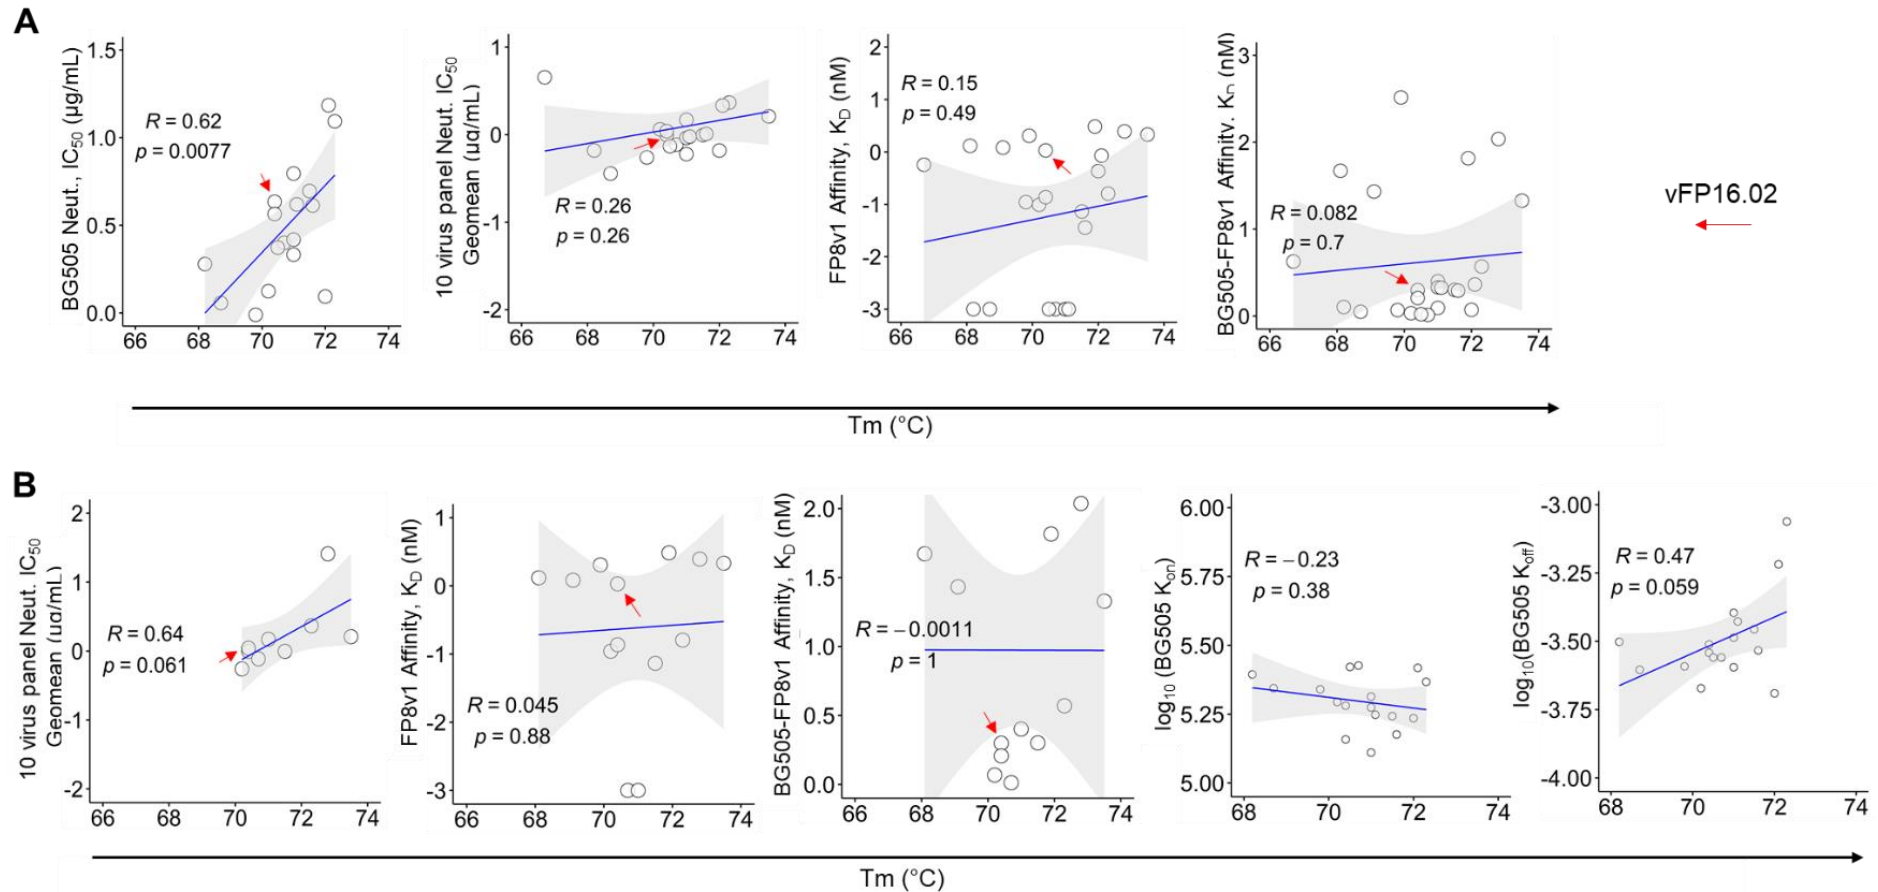

**Figure S11. Correlation plots for single variants between melting temperatures and soluble FP8v1 affinity, BG505-FPv1 HIV-1 trimer Env, BG505 neutralization IC50 titers and neutralization IC50 geomean on a 10-virus panel. (A) Correlation plots for all single variants selected against BG505\_FP8v1 and v2. (B) Correlation plots for single variants selected exclusively against BG505-FP8v1 during yeast surface display screening. Variants with neutralization IC<sub>50</sub> >50 µg/mL were excluded from these analyses. Shaded areas indicate 95% confidence limits.**

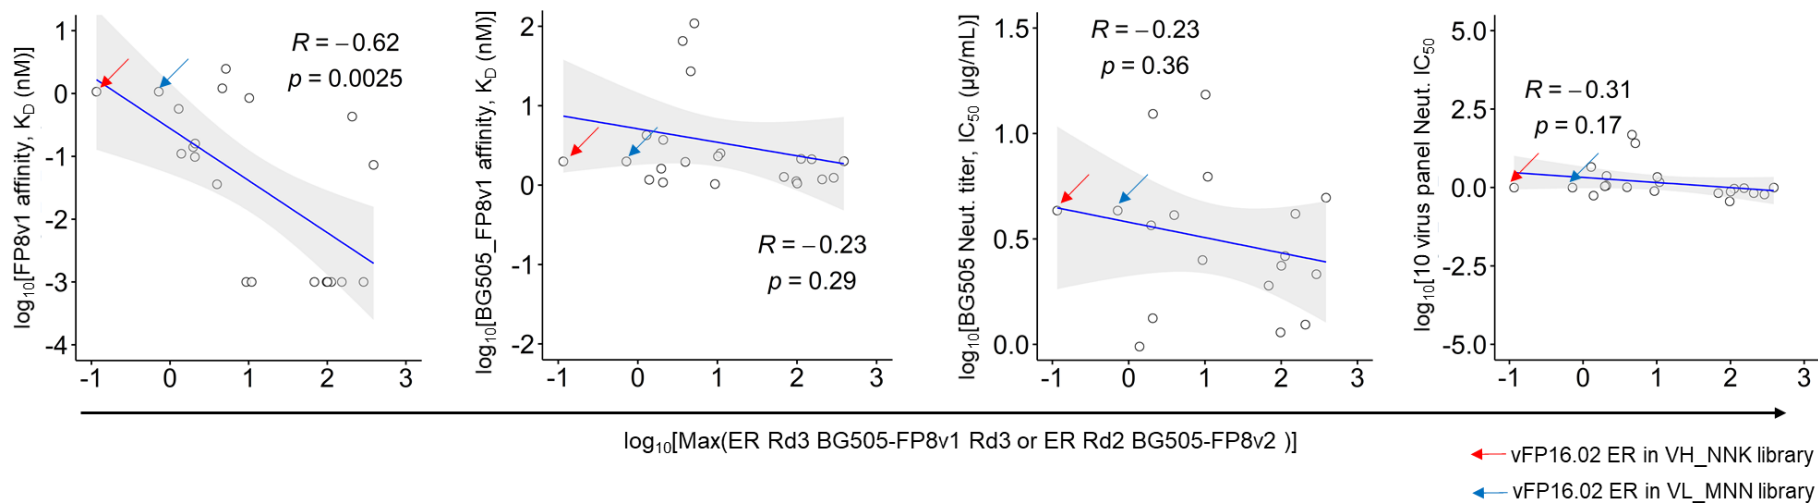

**Figure S12. Correlations between functional parameters of vFP16.02 selected single variants and yeast display library enrichment ratios (ER).** Correlations for all single variants selected against BG505\_FP8v1 and v2 during yeast surface display screening. Different library sorts showed different magnitudes of enrichment ratios (e.g. heavy vs. light, BG505\_FP8v1 vs. BG505\_FP8v2), which complicates ER-based comparisons. Shaded areas indicate 95% confidence limits.

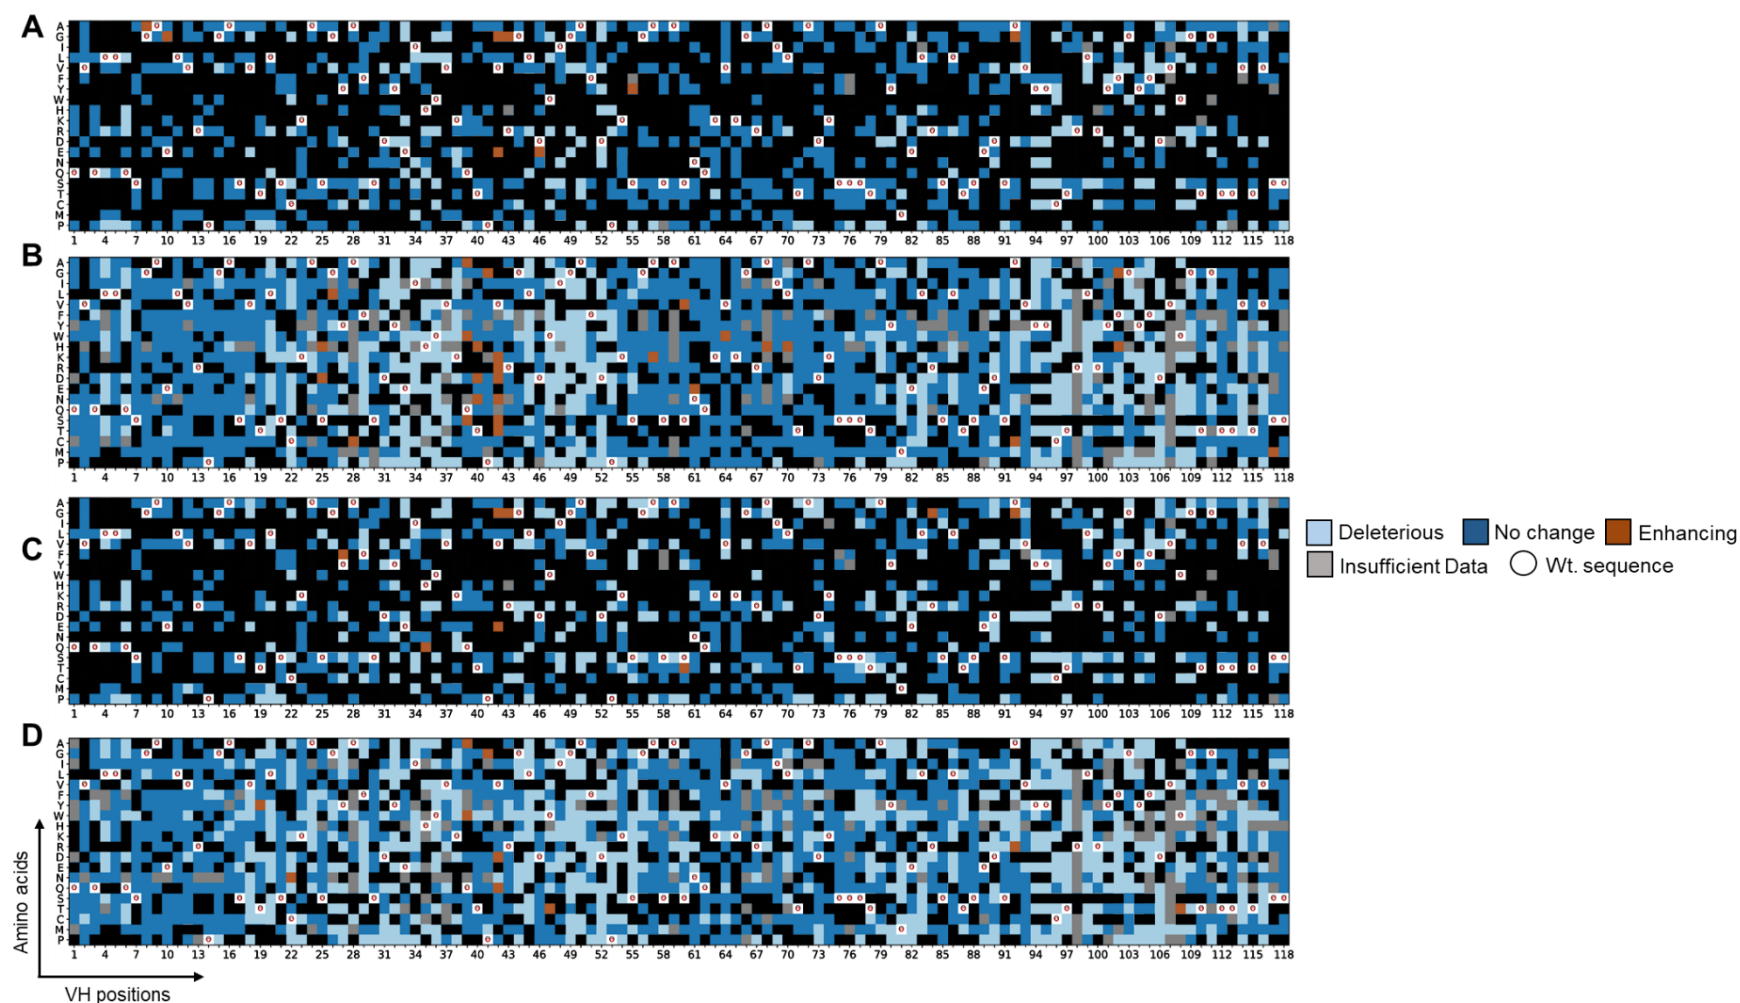

**Figure S13. Heat maps highlighting functional landscapes for single vs. double/triple DNA base substitutions needed for VH single amino acid variants. (A)** Single nucleotide substitutions (with multiple nucleotide substitutions blackened-out) for VH-NNK libraries against BG505-FP8v1. **(B)** Heat map for multiple ( $\geq 2$ ) nucleotide substitutions (single nucleotide substitutions blackened-out) for VH-NNK libraries against BG505-FP8v1. **(C)** Single nucleotide substitutions (with multiple nucleotide substitutions blackened-out) for VH-NNK libraries against BG505-FP8v2. **(D)** Heat map for multiple ( $\geq 2$ ) nucleotide substitutions (single nucleotide substitutions blackened-out) for VH-NNK libraries against BG505-FP8v2.

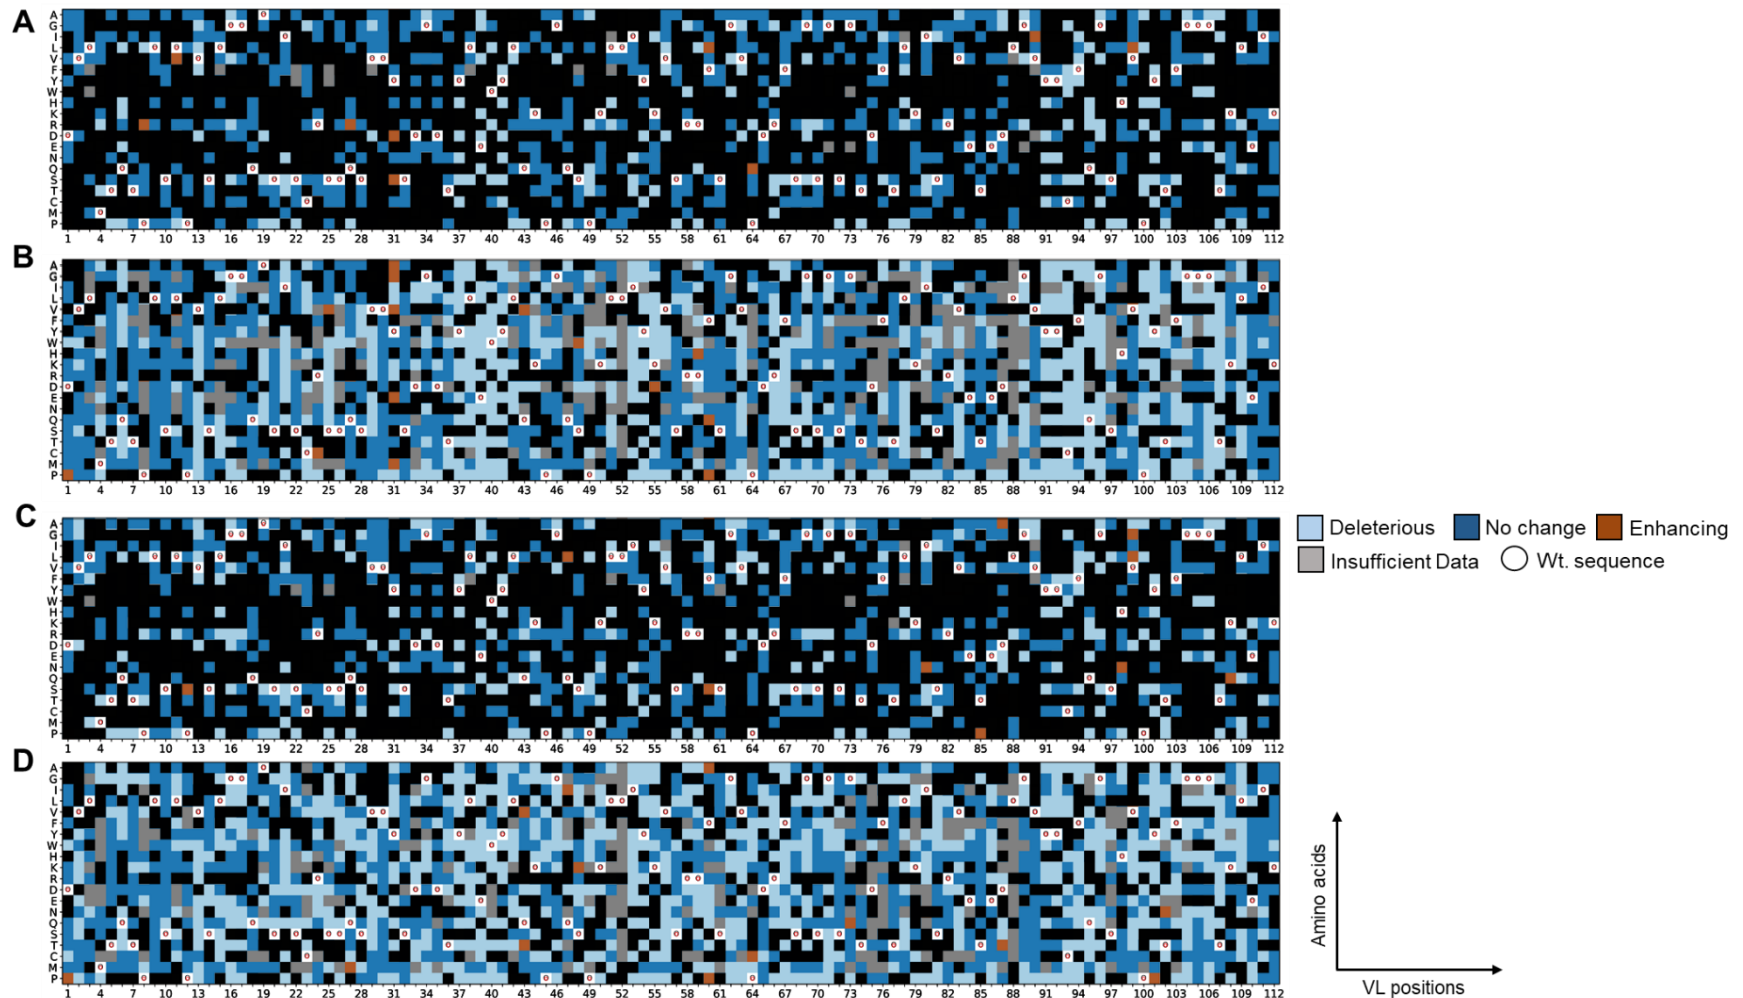

**Figure S14. Heat maps highlighting functional landscapes for single vs. double/triple DNA base substitutions needed for VL single amino acid variants.** Single nucleotide substitutions (with multiple nucleotide substitutions blackened-out) for VL-MNN libraries against BG505-FP8v1. **(B)** Heat map for multiple ( $\geq 2$ ) nucleotide substitutions (single nucleotide substitutions blackened-out) for VL-MNN libraries against BG505-FP8v1. **(C)** Single nucleotide substitutions (with multiple nucleotide substitutions blackened-out) for VL-MNN libraries against BG505-FP8v2. **(D)** Heat map for multiple ( $\geq 2$ ) nucleotide substitutions (single nucleotide substitutions blackened-out) for VL-MNN libraries against BG505-FP8v2.

## Supplementary Tables

**Table S1. (A) *E. coli* and (B) Yeast transformation experiments statistics for generating vFP16.02 VH\_NNK and VL\_MNN libraries.**

**A**

| <i>E. coli</i> Transformation |                |                   |                 |               |                      |                  |                       |                                       |
|-------------------------------|----------------|-------------------|-----------------|---------------|----------------------|------------------|-----------------------|---------------------------------------|
| Library Name                  | Transformation | Theoretical Size* | # Transformants | Fold coverage | # Colonies sequenced | Single mutations | Adjusted library size | Adjusted fold coverage (on DNA level) |
| VL-MNN lib.                   | 1              | 3,584             | 8.09E+05        | 225           | 19                   | 11               | 4.68E+05              | 131                                   |
| VL-MNN lib.                   | 2              | 3,584             | 1.37E+06        | 382           | 20                   | 9                | 6.17E+05              | 172                                   |
| VH-NNK lib.                   | 1              | 3,776             | 6.53E+06        | 1,729         | 18                   | 9                | 3.27E+06              | 865                                   |

**B**

| <i>Yeast transformation</i> |                   |                |                              |
|-----------------------------|-------------------|----------------|------------------------------|
| Library                     | Theoretical size* | #Transformants | Fold coverage (on DNA level) |
| VL-SSM lib.                 | 3,584             | 2.20E+06       | 614                          |
| VH-SSM lib.                 | 3,776             | 1.90E+06       | 503                          |

\*Theoretical library size on DNA level was calculated as length of VH/VL gene×No. of codons. For VH gene, the theoretical library size: 118×32=3,776; VL gene=112×32=3,584.

**Table S2.** vFP16.02 single mutational landscape analysis statistics.

| Variable Region | Amino acid length | Theoretical size |
|-----------------|-------------------|------------------|
| VH              | 118               | 2,242            |
| VL              | 112               | 2,128            |

| Mutation Category       | VH_NNK vs. BG505-FP8v1 | % of mutations | VH_NNK vs. BG505-FP8v2 | % of mutations | VL_MNN vs. BG505-FP8v1 | % of mutations | VL_MNN vs. BG505-FP8v2 | % of mutations | Adjusted Average % |
|-------------------------|------------------------|----------------|------------------------|----------------|------------------------|----------------|------------------------|----------------|--------------------|
| Enhancing               | 35                     | 1.56           | 18                     | 0.803          | 23                     | 1.08           | 23                     | 1.08           | 1.30               |
| No Change               | 1,400                  | 62.4           | 1,222                  | 54.5           | 1,066                  | 50.1           | 1,014                  | 47.7           | 59.6               |
| Deleterious             | 617                    | 27.5           | 813                    | 36.3           | 756                    | 35.5           | 878                    | 41.3           | 39.1               |
| No Data or Minor Effect | 190                    | 8.47           | 189                    | 8.43           | 283                    | 13.3           | 213                    | 10.0           |                    |
| <b>Total</b>            | <b>2,242</b>           | <b>100</b>     | <b>2,242</b>           | <b>100</b>     | <b>2,128</b>           | <b>100</b>     | <b>2,128</b>           | <b>100</b>     | <b>100</b>         |

Statistics calculated using Round 2 sorted samples.

**Table S3.** Summary of single/combination mutations selected after FACS screening with their biochemical characteristics.

| Mutation                    | Structural location | BG505-FP8v1      | BG505-FP8v2      | Fusion Peptide      |                                                    |                                     | BG505.DS.SOSIP      |                                                    |                                     | Melting Temperature (°C) | IC <sub>50</sub> (BG505.W6.M.C2.SG3) (µg/mL) | IC <sub>50</sub> (Geomean, 10 viruses) (µg/mL) | IC <sub>80</sub> (Geomean, 10 viruses) (µg/mL) | Fold Change in neutralization* |      |
|-----------------------------|---------------------|------------------|------------------|---------------------|----------------------------------------------------|-------------------------------------|---------------------|----------------------------------------------------|-------------------------------------|--------------------------|----------------------------------------------|------------------------------------------------|------------------------------------------------|--------------------------------|------|
|                             |                     | High Aff. Rd3 ER | High Aff. Rd2 ER | K <sub>D</sub> (nM) | K <sub>on</sub> (M <sup>-1</sup> s <sup>-1</sup> ) | K <sub>off</sub> (s <sup>-1</sup> ) | K <sub>D</sub> (nM) | K <sub>on</sub> (M <sup>-1</sup> s <sup>-1</sup> ) | K <sub>off</sub> (s <sup>-1</sup> ) |                          |                                              |                                                |                                                |                                |      |
| Heavy chain single variants | vFP16.02            |                  | 0.0116           | 0.717               | 1.07                                               | 5.79E+05                            | 6.19E-04            | 0.113                                              | 2.73E+06                            | 3.09E-04                 | 70.4                                         | 4.31                                           | 0.99                                           | 5.38                           | 1.00 |
|                             | Q39A                | FR2              | 0.0              | 1.39                | 0.11                                               | 6.16E+05                            | 6.75E-05            | 0.048                                              | 4.60E+06                            | 2.22E-04                 | 69.8                                         | 0.976                                          | 0.55                                           | 2.70                           | 1.80 |
|                             | Q39S                | FR2              | 2.07             | 0.146               | 0.098                                              | 5.41E+05                            | 5.30E-05            | 0.0563                                             | 3.86E+06                            | 2.18E-04                 | 70.2                                         | 1.33                                           | 1.15                                           | 4.44                           | 0.86 |
|                             | Q39W                | FR2              | 26.1             | 289.5               | <0.001                                             | 7.10E+05                            | <1.0E-07            | 0.0595                                             | 4.13E+06                            | 2.46E-04                 | 71.0                                         | 2.15                                           | 0.60                                           | 3.10                           | 1.65 |
|                             | T40N                | FR2              | 1.97             | 0.0                 | 0.14                                               | 6.57E+05                            | 8.99E-05            | 0.084                                              | 3.73E+06                            | 3.14E-04                 | 70.4                                         | 3.67                                           | 1.10                                           | 5.79                           | 0.90 |
|                             | P41G                | FR2              | 9.31             | 0.003               | <0.001                                             | 5.49E+05                            | <1.0E-07            | 0.0512                                             | 5.27E+06                            | 2.70E-04                 | 70.7                                         | 2.51                                           | 0.77                                           | 3.66                           | 1.29 |
|                             | V42G                | FR2              | 387.0            | 260.2               | 0.073                                              | 5.65E+05                            | 4.15E-05            | 0.089                                              | 3.64E+06                            | 3.24E-04                 | 71.5                                         | 4.96                                           | 0.99                                           | 4.94                           | 1.00 |
|                             | V42E                | FR2              | 10.9             | 6.58                | <0.001                                             | 3.36E+05                            | <1.0E-07            | 0.126                                              | 2.58E+06                            | 3.25E-04                 | 71.0                                         | 6.24                                           | 1.48                                           | 6.30                           | 0.67 |
|                             | S60V                | FR3              | 2.08             | 0.0                 | 0.16                                               | 5.42E+05                            | 8.57E-05            | 0.190                                              | 4.58E+06                            | 8.70E-04                 | 72.3                                         | 12.4                                           | 2.33                                           | 13.2                           | 0.42 |
|                             | A92G                | FR3              | 12.1             | 207.1               | 0.43                                               | 5.88E+05                            | 2.51E-04            | 0.0587                                             | 3.44E+06                            | 2.02E-04                 | 72.0                                         | 1.24                                           | 0.66                                           | 3.34                           | 1.50 |
| F102G                       | CDR3                | 3.66             | 0.00295          | 3.05                | 3.81E+05                                           | 1.16E-03                            | 3.00                | 1.06E+06                                           | 3.15E-02                            | 71.9                     | >50                                          | 50.0                                           | 50.0                                           | N.N.                           |      |
| V107G                       | CDR3                | 0.0              | 1.28             | 0.57                | 5.63E+05                                           | 3.20E-04                            | 0.23                | 3.09E+06                                           | 7.15E-04                            | 66.7                     | >50                                          | 4.52                                           | 19.09                                          | 0.22                           |      |
| Light chain single variants | Y31A                | CDR1             | 880.3            | 0.111               | 2.15                                               | 4.19E+05                            | 9.02E-04            | 0.944                                              | 7.98E+06                            | 7.53E-03                 | 73.5                                         | >50                                            | 12.68                                          | 28.1                           | 0.08 |
|                             | Y31D                | CDR1             | 6.33             | 0.209               | 2.03                                               | 1.05E+06                            | 2.12E-03            | 8.45                                               | 4.83E+07                            | 4.08E-01                 | 69.9                                         | >50                                            | 50.0                                           | 50.0                           | N.N. |
|                             | Y31S                | CDR1             | 5.57             | 0.041               | 1.31                                               | 6.87E+05                            | 8.99E-04            | 2.20                                               | 1.07E+07                            | 2.36E-02                 | 72.8                                         | >50                                            | 50.0                                           | 50.0                           | N.N. |
|                             | Y31E                | CDR1             | 5.12             | 0.029               | 2.47                                               | 6.38E+05                            | 1.58E-03            | 3.58                                               | 4.16E+07                            | 1.49E-01                 | 68.1                                         | >50                                            | 25.73                                          | 29.4                           | 0.04 |
|                             | Y31V                | CDR1             | 4.61             | 0.0                 | 1.21                                               | 4.92E+05                            | 5.95E-04            | 1.26                                               | 5.05E+06                            | 6.35E-03                 | 69.1                                         | >50                                            | 47.96                                          | 50.0                           | N.N. |
|                             | Q43T                | FR2              | 0.004            | 68.4                | <0.001                                             | 1.58E+05                            | <1.0E-07            | 0.065                                              | 4.86E+06                            | 3.14E-04                 | 68.2                                         | 1.90                                           | 0.66                                           | 3.42                           | 1.50 |
|                             | Q43V                | FR2              | 34.5             | 112.3               | <0.001                                             | 3.58E+05                            | 2.33E-04            | 0.087                                              | 4.07E+06                            | 3.54E-04                 | 71.0                                         | 2.62                                           | 0.92                                           | 4.76                           | 1.08 |
|                             | S48K                | FR2              | 0.0              | 97.8                | <0.001                                             | 6.05E+05                            | <1.0E-07            | 0.061                                              | 4.27E+06                            | 2.60E-04                 | 68.7                                         | 1.14                                           | 0.36                                           | 1.43                           | 2.75 |
|                             | F60A                | FR3              | 0.071            | 10.2                | 0.85                                               | 4.69E+05                            | 3.97E-04            | 0.197                                              | 2.19E+06                            | 4.33E-04                 | 72.1                                         | 15.3                                           | 2.16                                           | 13.08                          | 0.46 |
|                             | F60P                | FR3              | 53.8             | 153.1               | <0.001                                             | 8.23E+05                            | <1.0E-07            | 0.106                                              | 3.52E+06                            | 3.72E-04                 | 71.1                                         | 4.16                                           | 0.95                                           | 4.59                           | 1.04 |
|                             | T85P                | FR3              | 0.008            | 3.95                | 0.036                                              | 4.65E+05                            | 1.69E-05            | 0.0869                                             | 3.12E+06                            | 2.71E-04                 | 71.6                                         | 4.10                                           | 1.02                                           | 5.95                           | 0.97 |
|                             | V99L                | CDR3             | 24.2             | 100.4               | <0.001                                             | 7.81E+05                            | <1.0E-07            | 4.20                                               | 7.92E+06                            | 3.34E-02                 | 70.5                                         | 2.36                                           | 0.74                                           | 3.11                           | 1.34 |

Fold change calculated as IC<sub>50</sub> Geomean wt/ IC<sub>50</sub> Geomean mutant.  
N.N.= Non Neutralizing

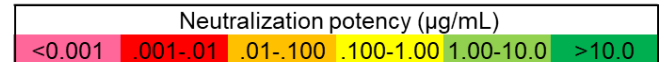



**Table S4.** Neutralization IC<sub>80</sub> of vFP16.02 single variants against a panel of 10 viral isolates.

|                             |          | IC80<br>(µg/ml)      |                    |               |                |                 |                 |                |                |                     |                     |                |                     |
|-----------------------------|----------|----------------------|--------------------|---------------|----------------|-----------------|-----------------|----------------|----------------|---------------------|---------------------|----------------|---------------------|
| clade                       |          | A                    | A                  | A             | AE             | AG              | B               | B              | BC             | C                   | C                   | C              | C                   |
| Antibody virus              |          | BG505.W6<br>M.C2.SG3 | KER2008.12<br>.SG3 | Q23.17.<br>G3 | SCNE56.SG<br>3 | T278-<br>50.SG3 | 3988.25.S<br>G3 | BL01.DG.<br>G3 | SCNE19.SG<br>3 | 0077.v1.c16<br>.SG3 | 25710-2.43.<br>.SG3 | 286.36<br>.SG3 | 6644.V2.C<br>33.SG3 |
| Heavy Chain Single Variants | vFP16.02 | 15.0                 | 19.9               | 34.0          | 3.00           | >50             | >50             | 15.8           | 0.732          | 3.87                | 0.724               | >50            | >50                 |
|                             | Q39A     | 4.02                 | 4.15               | 4.74          | 1.26           | >50             | >50             | 4.23           | 0.264          | 1.03                | 0.420               | 8.49           | >50                 |
|                             | Q39S     | 3.49                 | 4.08               | 3.82          | 1.35           | >50             | >50             | 3.52           | >50            | 1.27                | 0.414               | 8.67           | >50                 |
|                             | Q39W     | 6.20                 | 5.99               | 3.64          | 1.53           | >50             | >50             | 4.45           | 0.262          | 1.46                | 0.341               | 13.6           | >50                 |
|                             | T40N     | 11.5                 | 15.6               | 10.6          | 2.96           | >50             | >50             | 12.2           | 0.279          | 2.37                | 0.629               | 29.9           | >50                 |
|                             | P41G     | 7.40                 | 7.32               | 7.10          | 1.73           | >50             | >50             | 4.59           | 0.327          | 1.61                | 0.406               | 13.3           | >50                 |
|                             | V42G     | 11.7                 | 10.9               | 8.28          | 1.64           | >50             | >50             | 8.04           | 0.420          | 2.16                | 0.459               | 29.7           | >50                 |
|                             | V42E     | 14.5                 | 16.5               | 16.6          | 1.86           | >50             | >50             | 12.8           | 0.532          | 2.8                 | 0.588               | 23.7           | >50                 |
|                             | S60V     | >50                  | >50                | >50           | 4.32           | >50             | 18.8            | 38.2           | 1.76           | 5.15                | 0.920               | >50            | >50                 |
|                             | A92G     | 5.13                 | 5.20               | 5.82          | 1.59           | >50             | >50             | 5.34           | 0.318          | 1.48                | 0.483               | 11.4           | >50                 |
|                             | F102G    | >50                  | >50                | >50           | >50            | >50             | >50             | >50            | >50            | >50                 | >50                 | >50            | >50                 |
| V107G                       | >50      | >50                  | >50                | 9.14          | >50            | >50             | >50             | 2.66           | 10.4           | 1.63                | >50                 | >50            |                     |
| Light Chain Single Variants | Y31A     | >50                  | >50                | >50           | >50            | >50             | >50             | >50            | 0.269          | 34.1                | 42.9                | >50            | >50                 |
|                             | Y31D     | >50                  | >50                | >50           | >50            | >50             | >50             | >50            | >50            | >50                 | >50                 | >50            | >50                 |
|                             | Y31E     | >50                  | >50                | >50           | >50            | >50             | >50             | >50            | 0.244          | >50                 | >50                 | >50            | >50                 |
|                             | Y31S     | >50                  | >50                | >50           | >50            | >50             | >50             | >50            | >50            | >50                 | >50                 | >50            | >50                 |
|                             | Y31V     | >50                  | >50                | >50           | >50            | >50             | >50             | >50            | >50            | >50                 | >50                 | >50            | >50                 |
|                             | Q43T     | 6.59                 | 5.51               | 7.08          | 1.73           | >50             | >50             | 5.9            | 0.266          | 1.11                | 0.428               | 13.1           | >50                 |
|                             | Q43V     | 8.42                 | 8.98               | 7.63          | 2.40           | >50             | >50             | 7.07           | 0.420          | 1.93                | 0.593               | 25.4           | >50                 |
|                             | S48K     | 3.65                 | 3.51               | 4.48          | 0.745          | >40             | >40             | 2.47           | 0.161          | 0.773               | 0.220               | 8.89           | >40                 |
|                             | F60A     | >50                  | 37.9               | >50           | 3.86           | >50             | >50             | 41.2           | 1.02           | 4.54                | 0.840               | >50            | >50                 |
|                             | F60P     | 16.1                 | 10.7               | >20           | 1.88           | nd              | >20             | 7.75           | 0.343          | 1.53                | 0.395               | >20            | nd                  |
|                             | T85P     | 13.2                 | 13.7               | 14.9          | 2.65           | >50             | >50             | 12.5           | 0.461          | 1.92                | 0.736               | 19.2           | >50                 |
| V99L                        | 5.59     | 9.32                 | 5.59               | 1.10          | >20            | >20             | 3.83            | 0.347          | 1.19           | 0.413               | >20                 | >20            |                     |

Neutralization potency (µg/mL)

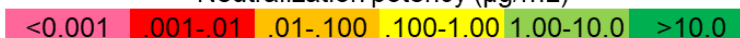

**Table S5.** Combination mutational variants designed for further improvement of vFP16.02 by rationally combining improved single variants.

| Antibody         | Heavy Chain Mutations     | Light Chain Mutations     | IC <sub>50</sub> GeoMean<br>(10 virus panel;<br>µg/mL) | IC <sub>50</sub><br>(BG505.W6M.C2<br>.SG3; µg/mL) |
|------------------|---------------------------|---------------------------|--------------------------------------------------------|---------------------------------------------------|
| vFP16.02 wt      | -                         | -                         | 0.950                                                  | 3.57                                              |
| vFP16.02 combo01 | VH-Q39W                   | VL-V99L                   | 0.495                                                  | 1.04                                              |
| vFP16.02 combo02 | VH-A92G                   | VL-F60P                   | 0.450                                                  | 1.14                                              |
| vFP16.02 combo03 | VH-P41G, VH-Q39A          | VL-S48K                   | 0.321                                                  | 0.50                                              |
| vFP16.02 combo04 | VH-P41G, VH-V42G          | VL-V99L                   | 0.526                                                  | 0.68                                              |
| vFP16.02 combo05 | VH-Q39A, VH-P41G, VH-V42G | VL-S48K                   | 0.514                                                  | 1.16                                              |
| vFP16.02 combo06 | VH-P41G, VH-V42N          | VL-V99L                   | 0.567                                                  | 1.37                                              |
| vFP16.02 combo07 | VH-P41G, VH-V42N          | VL-F60P                   | 0.587                                                  | 2.00                                              |
| vFP16.02 combo08 | VH-Q39A                   | VL-F60P, VL-V99L          | 0.439                                                  | 1.02                                              |
| vFP16.02 combo09 | VH-Q39A                   | VL-F60P, VL-V99L, VL-S48K | 0.596                                                  | 1.11                                              |
| vFP16.02 combo10 | VH-P41G, VH-V42G          | VL-F60P, VL-S48K          | 1.01                                                   | 3.64                                              |
| vFP16.02 combo11 | VH-Q39A                   | VL-S48K                   | 0.614                                                  | 1.50                                              |
| vFP16.02 combo12 | VH-Q39W                   | VL-S48K                   | 0.763                                                  | 1.31                                              |

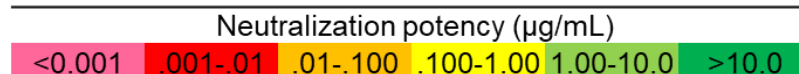

**Table S6.** Neutralization IC<sub>50</sub> potency of combination variants of vFP16.02 against a panel of 10 isolates.

| Antibody            | Clade                    | A                  | A              | A             | AE              | AG              | B               | B             | BC                  | C                  | C              | C                   | C   |
|---------------------|--------------------------|--------------------|----------------|---------------|-----------------|-----------------|-----------------|---------------|---------------------|--------------------|----------------|---------------------|-----|
| Virus               | BG505.W<br>6M.C2.S<br>G3 | KER2008.<br>12.SG3 | Q23.17.S<br>G3 | CNE56.S<br>G3 | T278-<br>50.SG3 | 3988.25<br>.SG3 | BL01.DG<br>.SG3 | CNE19<br>.SG3 | 0077.v1.<br>c16.SG3 | 25710-<br>2.43.SG3 | 286.36.S<br>G3 | 6644.V2.<br>C33.SG3 |     |
| vFP16.02            |                          | 3.57               | 0.432          | 0.416         | 0.793           | >50             | 15.3            | 2.22          | 0.105               | 0.999              | 0.124          | 2.65                | >50 |
| vFP16.02<br>combo01 |                          | 1.04               | 0.389          | 0.290         | 0.484           | >50             | 5.92            | 0.696         | 0.085               | 0.458              | 0.088          | 1.11                | >50 |
| vFP16.02<br>combo02 |                          | 1.14               | 0.127          | 0.210         | 0.450           | >50             | 5.27            | 1.10          | 0.097               | 0.392              | 0.102          | 1.11                | >50 |
| vFP16.02<br>combo03 |                          | 0.496              | 0.117          | 0.160         | 0.308           | >50             | 3.02            | 0.692         | 0.087               | 0.359              | 0.064          | 0.963               | >50 |
| vFP16.02<br>combo04 |                          | 0.679              | 0.541          | 0.212         | 0.441           | >50             | 7.65            | 0.868         | 0.087               | 0.511              | 0.104          | 1.55                | >50 |
| vFP16.02<br>combo05 |                          | 1.16               | 0.524          | 0.460         | 0.519           | >50             | 4.00            | 0.592         | 0.066               | 0.479              | 0.118          | 1.01                | >50 |
| vFP16.02<br>combo06 |                          | 1.37               | 0.382          | 0.387         | 0.369           | >50             | 6.28            | 0.947         | 0.087               | 0.622              | 0.117          | 1.22                | >50 |
| vFP16.02<br>combo07 |                          | 2.00               | 0.139          | 0.317         | 0.217           | >50             | 7.16            | 1.97          | 0.121               | 0.519              | 0.103          | 2.79                | >50 |
| vFP16.02<br>combo08 |                          | 1.02               | 0.203          | 0.239         | 0.226           | >50             | 6.83            | 1.09          | 0.081               | 0.367              | 0.076          | 1.40                | >50 |
| vFP16.02<br>combo9  |                          | 1.11               | 0.450          | 0.262         | 0.378           | >50             | 10.7            | 1.25          | 0.080               | 0.598              | 0.113          | 1.57                | >50 |
| vFP16.02<br>combo10 |                          | 3.64               | 1.68           | 0.693         | 1.12            | >50             | 7.32            | 1.75          | 0.105               | 0.641              | 0.168          | 1.73                | >50 |

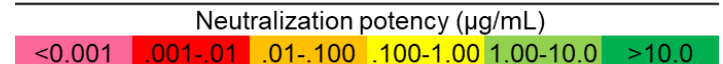

**Table S7.** Neutralization IC<sub>80</sub> potency of combination variants of vFP16.02 against a panel of 10 isolates.

| Antibody            | Clade<br>Virus | A                        | A                      | A              | AE            | AG              | B               | B               | BC            | C                   | C                  | C              | C                       |
|---------------------|----------------|--------------------------|------------------------|----------------|---------------|-----------------|-----------------|-----------------|---------------|---------------------|--------------------|----------------|-------------------------|
|                     |                | BG505.<br>W6M.C<br>2.SG3 | KER2<br>008.12<br>.SG3 | Q23.17<br>.SG3 | CNE56.<br>SG3 | T278-<br>50.SG3 | 3988.25<br>.SG3 | BL01.DG.<br>SG3 | CNE19<br>.SG3 | 0077.v1.<br>c16.SG3 | 25710-<br>2.43.SG3 | 286.36.<br>SG3 | 6644.V<br>2.C33.<br>SG3 |
| vFP16.02            |                | 13.6                     | 7.56                   | 12.3           | 2.91          | >50             | >50             | 8.65            | 0.471         | 2.96                | 0.578              | 26.2           | >50                     |
| vFP16.02<br>combo01 |                | 4.04                     | 3.60                   | 3.90           | 1.75          | >50             | >50             | 2.54            | 0.224         | 1.20                | 0.316              | 9.40           | >50                     |
| vFP16.02<br>combo02 |                | 5.62                     | 1.95                   | 5.58           | 1.89          | >50             | >50             | 3.54            | 0.285         | 1.54                | 0.385              | 12.8           | >50                     |
| vFP16.02<br>combo03 |                | 2.79                     | 1.80                   | 2.94           | 1.45          | >50             | >50             | 2.68            | 0.263         | 1.28                | 0.330              | 6.03           | >50                     |
| vFP16.02<br>combo04 |                | 5.00                     | 6.44                   | 4.42           | 1.59          | >50             | >50             | 2.93            | 0.284         | 1.30                | 0.368              | 11.8           | >50                     |
| vFP16.02<br>combo05 |                | 3.85                     | 3.86                   | 3.13           | 1.69          | >50             | >50             | 2.11            | 0.210         | 1.32                | 0.372              | 6.09           | >50                     |
| vFP16.02<br>combo06 |                | 4.55                     | 5.00                   | 5.79           | 1.57          | >50             | >50             | 3.50            | 0.276         | 1.55                | 0.387              | 10.6           | >50                     |
| vFP16.02<br>combo07 |                | 18.1                     | 5.87                   | 10.6           | 1.60          | >50             | >50             | 7.71            | 0.398         | 1.94                | 0.414              | 32.3           | >50                     |
| vFP16.02<br>combo08 |                | 6.97                     | 5.04                   | 5.00           | 1.40          | >50             | >50             | 4.07            | 0.290         | 1.34                | 0.319              | 19.5           | >50                     |
| vFP16.02<br>combo09 |                | 13.5                     | 7.03                   | 7.48           | 1.93          | >50             | >50             | 4.93            | 0.320         | 1.86                | 0.393              | 24.1           | >50                     |
| vFP16.02<br>combo10 |                | 11.9                     | 15.6                   | 16.1           | 2.10          | >50             | >50             | 6.42            | 0.363         | 1.90                | 0.406              | 31.6           | >50                     |

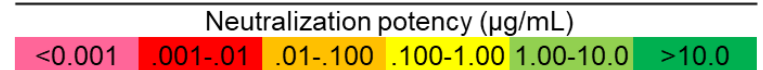

**Table S8.** Deep sequencing statistics.

| Sample Name                                     | # Raw reads    | # Linked reads | # Quality filtered reads (q30p90) | Reads with complete gene without stop codons | # Sequences with ONE aa different from wt. |
|-------------------------------------------------|----------------|----------------|-----------------------------------|----------------------------------------------|--------------------------------------------|
| vFP16.02_VH_NNK-VL-positive                     | 3,241,989      | 3,054,616      | 2,826,860                         | 2,658,070                                    | 1,700,701                                  |
| vFP16.02_VL_MNN-VL-positive                     | 2,576,377      | 2,136,732      | 1,844,466                         | 1,814,269                                    | 1,067,796                                  |
| vFP16.02_R1_1_VH_NNK (BG505-FP8v1-Low)          | 673,446        | 645,198        | 591,591                           | 557,338                                      | 385,303                                    |
| vFP16.02_R1_2_VH_NNK (BG505-FP8v1_Med)          | 348,053        | 338,366        | 307,947                           | 283,781                                      | 177,595                                    |
| <b>vFP16.02_R1_3_VH_NNK (BG505-FP8v1_High)</b>  | <b>517,617</b> | <b>498,426</b> | <b>454,893</b>                    | <b>429,852</b>                               | <b>265,797</b>                             |
| vFP16.02_R1_4_VH_NNK (BG505-FP8v2_Low)          | 567,891        | 532,055        | 491,135                           | 467,539                                      | 331,217                                    |
| vFP16.02_R1_5_VH_NNK (BG505-FP8v2_Med)          | 590,894        | 557,808        | 514,843                           | 481,540                                      | 299,570                                    |
| <b>vFP16.02_R1_6_VH_NNK (BG505-FP8v2_High)</b>  | <b>804,343</b> | <b>757,036</b> | <b>699,032</b>                    | <b>669,455</b>                               | <b>419,885</b>                             |
| vFP16.02_R1_7_VL_MNN (BG505-FP8v1_Low)          | 488,412        | 433,978        | 373,132                           | 360,458                                      | 257,481                                    |
| vFP16.02_R1_8_VL_MNN (BG505-FP8v1_Med)          | 884,676        | 693,948        | 572,246                           | 555,783                                      | 256,944                                    |
| <b>vFP16.02_R1_9_VL_MNN (BG505-FP8v1_High)</b>  | <b>407,564</b> | <b>380,974</b> | <b>324,721</b>                    | <b>312,193</b>                               | <b>169,963</b>                             |
| vFP16.02_R1_10_VL_MNN (BG505-FP8v2_Low)         | 581,428        | 414,670        | 343,176                           | 331,988                                      | 232,360                                    |
| vFP16.02_R1_11_VL_MNN (BG505-FP8v2_Med)         | 591,175        | 526,837        | 419,441                           | 406,551                                      | 223,437                                    |
| <b>vFP16.02_R1_12_VL_MNN (BG505-FP8v2_High)</b> | <b>499,312</b> | <b>453,617</b> | <b>392,878</b>                    | <b>379,549</b>                               | <b>202,867</b>                             |
| vFP16.02_R2_1_VH_NNK (BG505-FP8v1_Low)          | 866,906        | 796,257        | 732,397                           | 717,493                                      | 511,593                                    |
| vFP16.02_R2_2_VH_NNK (BG505-FP8v1_Med)          | 328,955        | 324,790        | 301,227                           | 292,011                                      | 166,036                                    |
| <b>vFP16.02_R2_3_VH_NNK (BG505-FP8v1_High)</b>  | <b>511,136</b> | <b>463,809</b> | <b>428,907</b>                    | <b>422,333</b>                               | <b>332,222</b>                             |
| vFP16.02_R2_4_VH_NNK (BG505-FP8v2_Low)          | 347,117        | 315,655        | 287,026                           | 281,398                                      | 205,843                                    |
| vFP16.02_R2_5_VH_NNK (BG505-FP8v2_Med)          | 592,231        | 575,739        | 521,794                           | 502,826                                      | 295,444                                    |
| <b>vFP16.02_R2_6_VH_NNK (BG505-FP8v2_High)</b>  | <b>82,348</b>  | <b>78,029</b>  | <b>65,785</b>                     | <b>64,479</b>                                | <b>49,347</b>                              |
| vFP16.02_R2_7_VL_MNN (BG505-FP8v1_Low)          | 724,647        | 628,030        | 528,822                           | 520,943                                      | 413,753                                    |
| vFP16.02_R2_8_VL_MNN (BG505-FP8v1_Med)          | 464,077        | 370,679        | 319,382                           | 315,124                                      | 111,016                                    |
| <b>vFP16.02_R2_9_VL_MNN (BG505-FP8v1_High)</b>  | <b>299,741</b> | <b>286,151</b> | <b>238,854</b>                    | <b>234,531</b>                               | <b>193,671</b>                             |
| vFP16.02_R2_10_VL_MNN (BG505-FP8v2_Low)         | 233,219        | 208,417        | 179,407                           | 176,239                                      | 139,543                                    |
| vFP16.02_R2_11_VL_MNN (BG505-FP8v2_Med)         | 560,550        | 512,003        | 433,992                           | 426,913                                      | 206,966                                    |
| <b>vFP16.02_R2_12_VL_MNN (BG505-FP8v2_High)</b> | <b>761,092</b> | <b>624,515</b> | <b>522,391</b>                    | <b>514,799</b>                               | <b>318,880</b>                             |
| vFP16.02_R3_1_VH_NNK (BG505-FP8v1-Low)          | 528,178        | 430,702        | 367,392                           | 359,883                                      | 260,093                                    |
| vFP16.02_R3_2_VH_NNK (BG505-FP8v1_Med)          | 881,646        | 738,056        | 633,377                           | 620,559                                      | 325,397                                    |
| <b>vFP16.02_R3_3_VH_NNK (BG505-FP8v1_High)</b>  | <b>498,302</b> | <b>426,056</b> | <b>357,975</b>                    | <b>352,294</b>                               | <b>277,510</b>                             |
| vFP16.02_R3_4_VH_NNK (BG505-FP8v2_Low)          | 717,190        | 579,841        | 499,838                           | 491,717                                      | 363,749                                    |
| vFP16.02_R3_5_VH_NNK (BG505-FP8v2_Med)          | 458,494        | 394,648        | 339,124                           | 331,619                                      | 182,162                                    |
| <b>vFP16.02_R3_6_VH_NNK (BG505-FP8v2_High)</b>  | <b>711,398</b> | <b>600,709</b> | <b>518,094</b>                    | <b>510,987</b>                               | <b>433,210</b>                             |
| vFP16.02_R3_7_VL_MNN (BG505-FP8v1_Low)          | 761,105        | 552,164        | 452,682                           | 444,620                                      | 353,228                                    |
| vFP16.02_R3_8_VL_MNN (BG505-FP8v1_Med)          | 1,022,851      | 751,986        | 622,681                           | 613,956                                      | 195,251                                    |
| <b>vFP16.02_R3_9_VL_MNN (BG505-FP8v1_High)</b>  | <b>606,295</b> | <b>532,021</b> | <b>400,546</b>                    | <b>392,892</b>                               | <b>320,500</b>                             |
| vFP16.02_R3_10_VL_MNN (BG505-FP8v2_Low)         | 720,427        | 541,323        | 451,844                           | 442,954                                      | 345,156                                    |
| vFP16.02_R3_11_VL_MNN (BG505-FP8v2_Med)         | 522,460        | 398,530        | 305,657                           | 300,040                                      | 126,863                                    |
| <b>vFP16.02_R3_12_VL_MNN (BG505-FP8v2_High)</b> | <b>777,876</b> | <b>499,718</b> | <b>410,887</b>                    | <b>403,487</b>                               | <b>61,306</b>                              |

**Table S9.** Crystal structure data collection and refinement statistics.

|                                | VL-S48K                      | VL-F60P                                        |
|--------------------------------|------------------------------|------------------------------------------------|
| PDB access code                | 6WWC                         | 6WX2                                           |
| Wavelength (Å)                 | 1                            | 1                                              |
| Resolution range               | 34.8 - 2.6 (2.7- 2.6)        | 35.1 - 2.4 (2.5 - 2.4)                         |
| Space group                    | P 2 <sub>1</sub>             | P 2 <sub>1</sub> 2 <sub>1</sub> 2 <sub>1</sub> |
| Unit cell                      | 68.6 70.5 93.3<br>90 94.8 90 | 73.2 111.7 123.8<br>90 90 90                   |
| Unique reflections             | 23878 (606)                  | 39868 (3090)                                   |
| Multiplicity                   | 3.1 (2.9)                    | 11.0 (9.5)                                     |
| Completeness (%)               | 83.1 (21.1)                  | 97.0 (76.4)                                    |
| Mean I/sigma(I)                | 9.2 (2.0)                    | 25.4 (2.0)                                     |
| Wilson B-factor                | 39.93                        | 47.27                                          |
| <i>R</i> -merge                | 0.124 (0.438)                | 0.155 (0.806)                                  |
| <i>R</i> -meas                 | 0.150 (0.527)                | 0.162 (0.852)                                  |
| <i>R</i> -pim                  | 0.083 (0.289)                | 0.048 (0.269)                                  |
| CC1/2                          | 0.988 (0.857)                | 0.999 (0.913)                                  |
| Reflections used in refinement | 23874 (605)                  | 39733 (3073)                                   |
| Reflections used for R-free    | 1108 (26)                    | 1992 (154)                                     |
| <i>R</i> -work                 | 0.21 (0.31)                  | 0.20 (0.27)                                    |
| <i>R</i> -free                 | 0.27 (0.49)                  | 0.24 (0.32)                                    |
| Number of non-hydrogen atoms   | 6814                         | 6783                                           |
| macromolecules                 | 6706                         | 6645                                           |
| solvent                        | 108                          | 138                                            |
| Protein residues               | 878                          | 872                                            |
| <i>RMS(bonds)</i>              | 0.006                        | 0.009                                          |
| <i>RMS(angles)</i>             | 1.32                         | 1.15                                           |
| Ramachandran favored (%)       | 96.98                        | 98.83                                          |
| Ramachandran allowed (%)       | 2.78                         | 1.17                                           |
| Ramachandran outliers (%)      | 0.23                         | 0                                              |
| Rotamer outliers (%)           | 0.13                         | 7.76                                           |
| Clashscore                     | 9.44                         | 6.4                                            |
| Average B-factor               | 42.98                        | 51.45                                          |
| macromolecules                 | 43.05                        | 51.5                                           |
| solvent                        | 38.8                         | 48.69                                          |

Statistics for the highest-resolution shell are shown in parentheses.

## SI References

1. B. Wang, *et al.*, Functional interrogation and mining of natively paired human V H :V L antibody repertoires. *Nat Biotechnol* **36**, 152–155 (2018).
2. E. E. Wrenbeck, *et al.*, Plasmid-based one-pot saturation mutagenesis. *Nat Methods* **13**, 928–930 (2016).
3. A. E. Wentz, E. V. Shusta, A Novel High-Throughput Screen Reveals Yeast Genes That Increase Secretion of Heterologous Proteins. *Appl Environ Microbiol* **73**, 1189–1198 (2007).
4. L. Benatuil, J. M. Perez, J. Belk, C.-M. Hsieh, An improved yeast transformation method for the generation of very large human antibody libraries. *Protein Eng Des Sel* **23**, 155–159 (2010).
5. J. D. Hunter, Matplotlib: A 2D Graphics Environment. *Computing in Science & Engineering* **9**, 90–95 (2007).
6. A. Kassambara, ggpubr: “ggplot2” Based Publication Ready Plots (2020).
7. A. Cui, *et al.*, A Model of Somatic Hypermutation Targeting in Mice Based on High-Throughput Ig Sequencing Data. *J. Immunol.* **197**, 3566–3574 (2016).
8. Z. Sheng, *et al.*, Gene-Specific Substitution Profiles Describe the Types and Frequencies of Amino Acid Changes during Antibody Somatic Hypermutation. *Front Immunol* **8**, 537 (2017).
9. Z. Otwinowski, W. Minor, [20] Processing of X-ray diffraction data collected in oscillation mode. *Meth. Enzymol.* **276**, 307–326 (1997).
10. A. J. McCoy, *et al.*, Phaser crystallographic software. *J Appl Crystallogr* **40**, 658–674 (2007).
11. P. Emsley, K. Cowtan, Coot: model-building tools for molecular graphics. *Acta Crystallogr. D Biol. Crystallogr.* **60**, 2126–2132 (2004).
12. P. D. Adams, *et al.*, Recent developments in the PHENIX software for automated crystallographic structure determination. *J Synchrotron Radiat* **11**, 53–55 (2004).
13. I. W. Davis, L. W. Murray, J. S. Richardson, D. C. Richardson, MOLPROBITY: structure validation and all-atom contact analysis for nucleic acids and their complexes. *Nucleic Acids Res.* **32**, W615-619 (2004).
14. J. C. Phillips, *et al.*, Scalable molecular dynamics with NAMD. *J Comput Chem* **26**, 1781–1802 (2005).
15. R. B. Best, *et al.*, Optimization of the additive CHARMM all-atom protein force field targeting improved sampling of the backbone  $\phi$ ,  $\psi$  and side-chain  $\chi(1)$  and  $\chi(2)$  dihedral angles. *J Chem Theory Comput* **8**, 3257–3273 (2012).

16. O. Guvench, *et al.*, CHARMM additive all-atom force field for carbohydrate derivatives and its utility in polysaccharide and carbohydrate-protein modeling. *J Chem Theory Comput* **7**, 3162–3180 (2011).
17. W. L. Jorgensen, J. Chandrasekhar, J. D. Madura, R. W. Impey, M. L. Klein, Comparison of simple potential functions for simulating liquid water. *Jcp* **79**, 926–935 (1983).
18. J. Dunbar, A. Fuchs, J. Shi, C. M. Deane, ABangle: characterising the VH-VL orientation in antibodies. *Protein Eng. Des. Sel.* **26**, 611–620 (2013).
19. R. Kong, *et al.*, Fusion peptide of HIV-1 as a site of vulnerability to neutralizing antibody. *Science* **352**, 828–833 (2016).
